# Supplementary material for: Hydrogen production via the aqueous-phase reforming of methanol catalyzed by Ru(ii) complexes of PNNP ligands
Source: Royal Society of Chemistry journal article supplement (doi:10.1039/d2qi01719a), 2022-11-15
Supplement: d2qi01719a1.pdf [file d2qi01719a1.pdf]

## Supplementary Information

### Contents

|                                             |    |
|---------------------------------------------|----|
| NMR spectrum of ligands and catalysts ..... | 2  |
| Supplementary Figures .....                 | 16 |
| Supplementary Tables.....                   | 19 |
| Crystallography Information .....           | 20 |

## NMR spectrum of ligands and catalysts

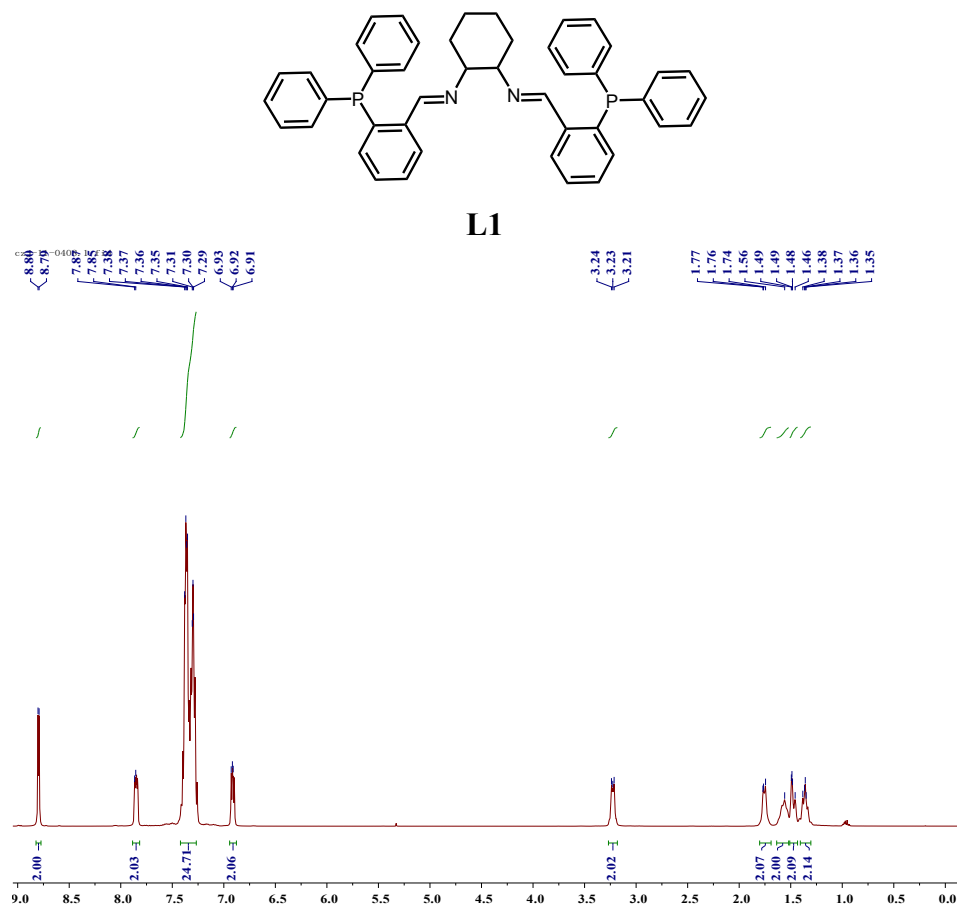

Figure S1. <sup>1</sup>H NMR of L1, CDCl<sub>3</sub>

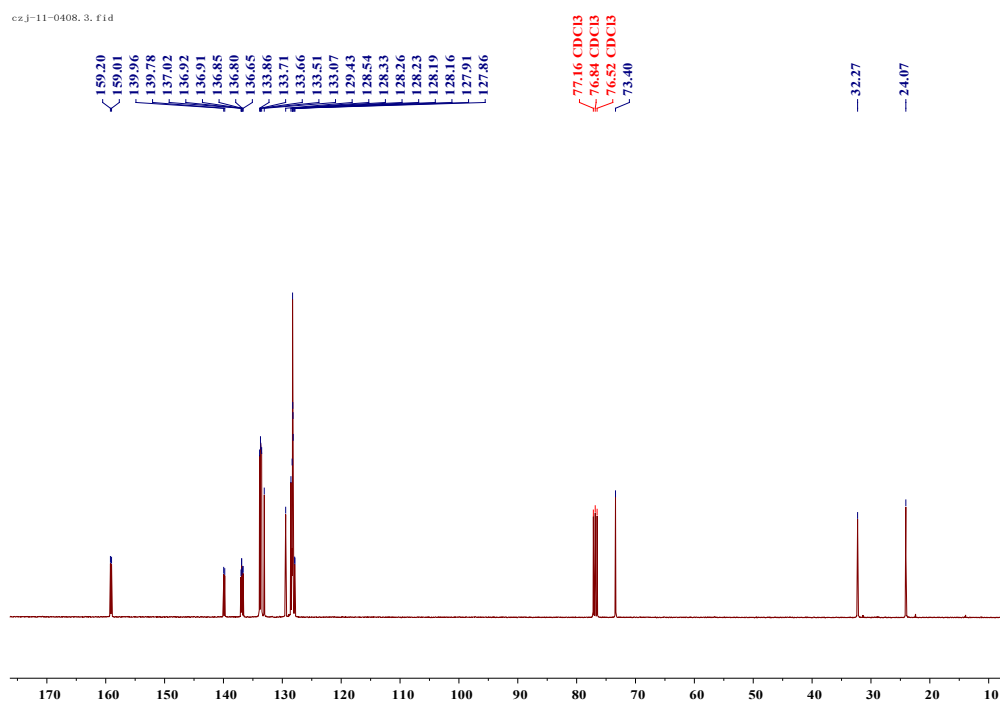

Figure S2. <sup>13</sup>C NMR of L1, CDCl<sub>3</sub>

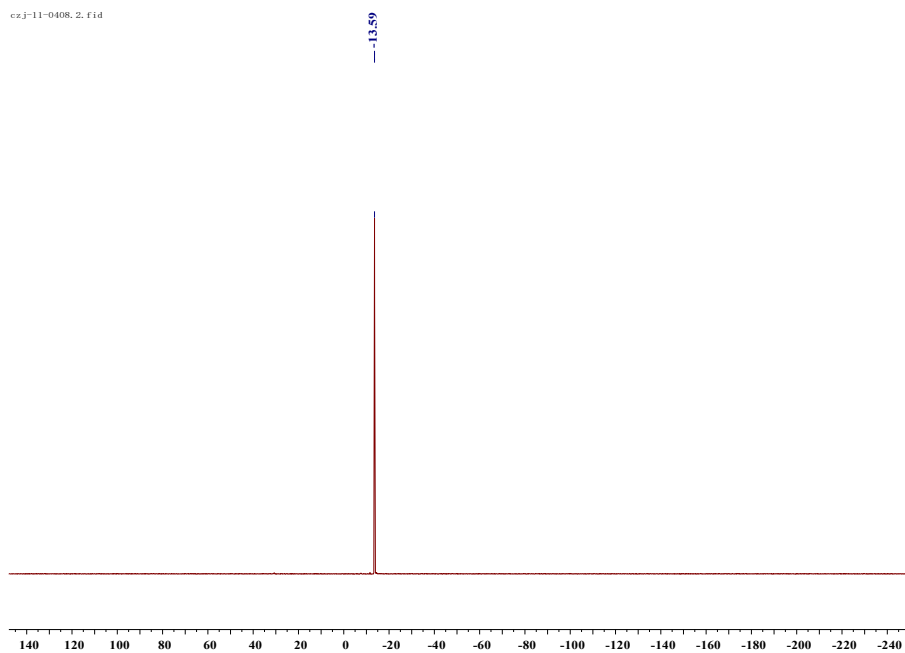

Figure S3.  $^{31}\text{P}$  NMR of L1,  $\text{CDCl}_3$

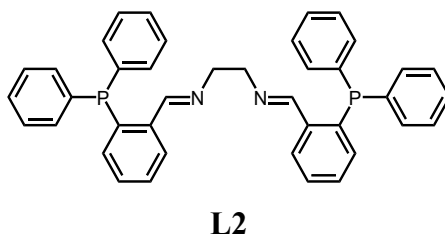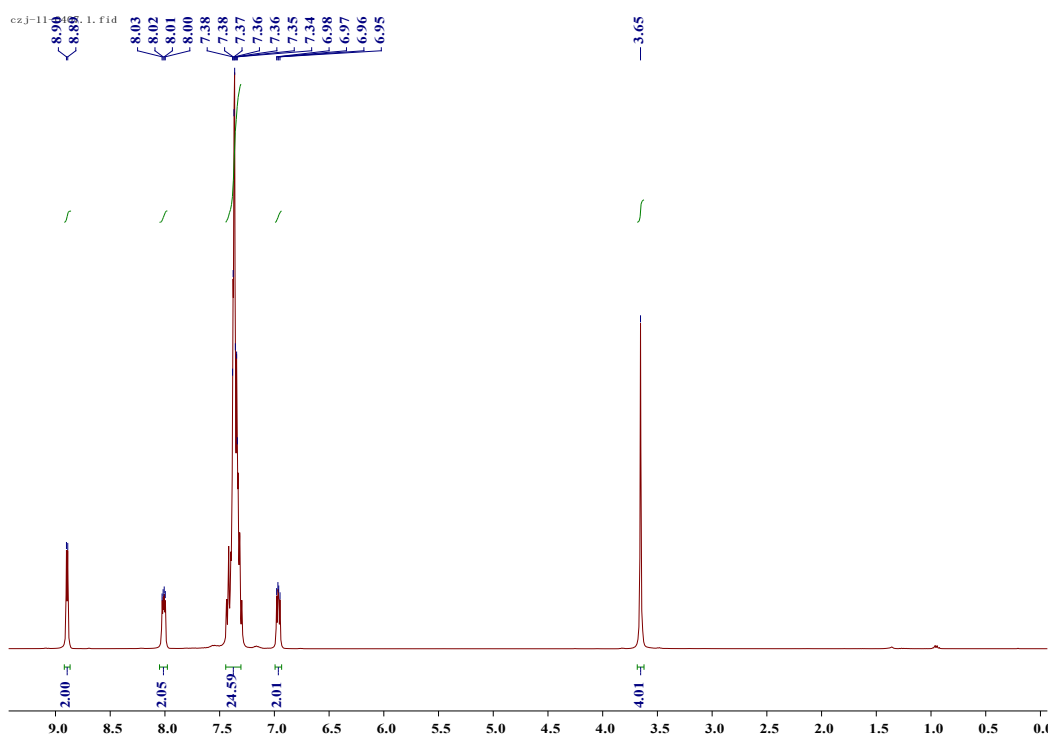

Figure S4.  $^1\text{H}$  NMR of L2,  $\text{CDCl}_3$

ezj-11-0407. 3. fid

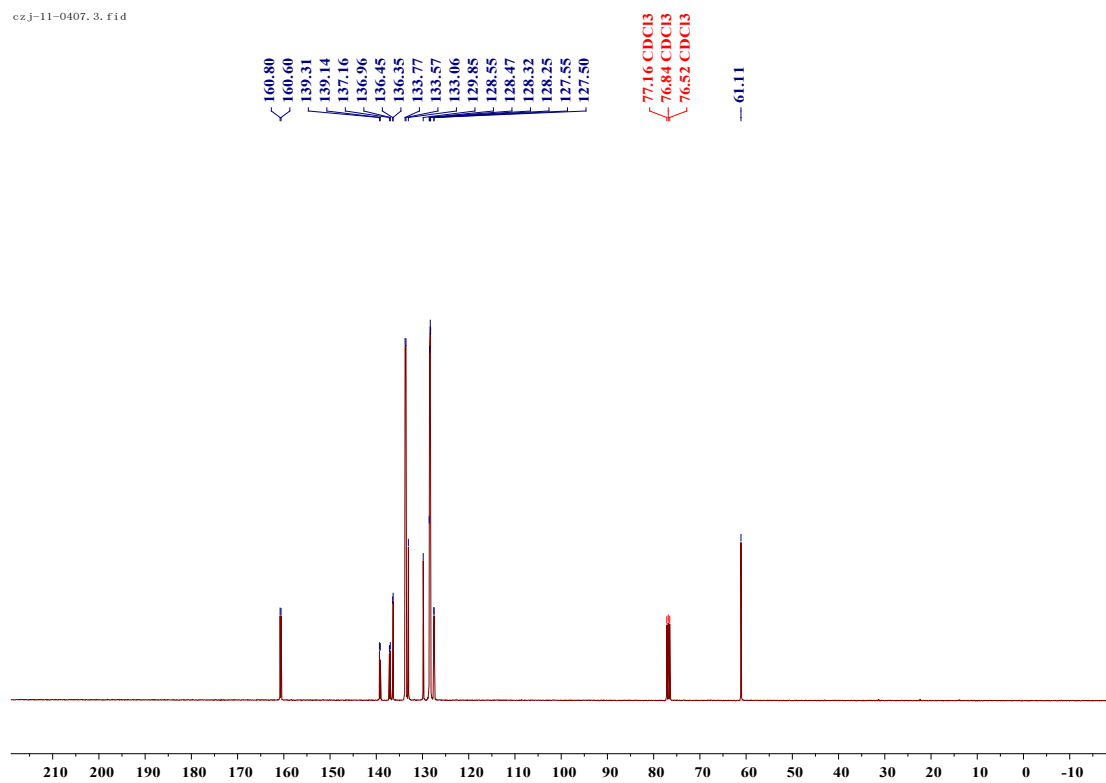

Figure S5.  $^{13}\text{C}$  NMR of L2,  $\text{CDCl}_3$

ezj-11-0407. 2. fid

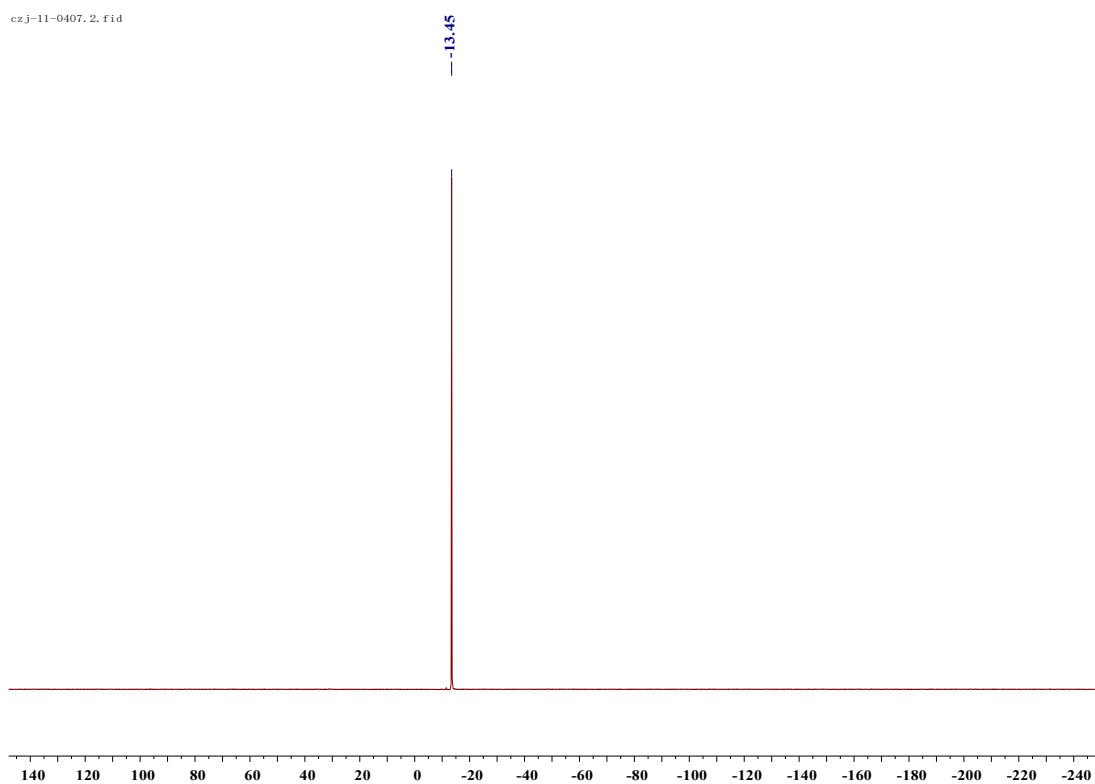

Figure S6.  $^{31}\text{P}$  NMR of L2,  $\text{CDCl}_3$

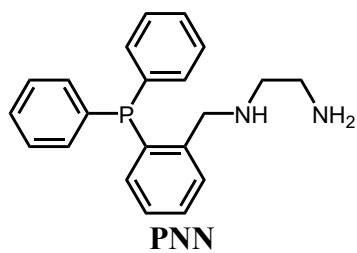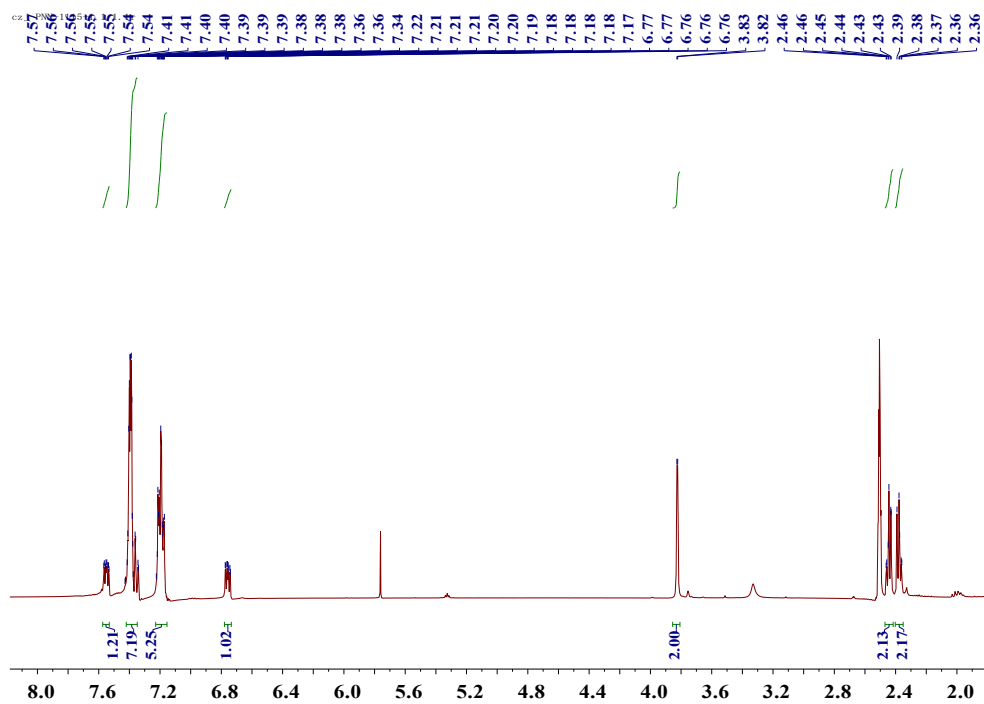

**Figure S7.**  $^1\text{H}$  NMR of PNN, DMSO- $d_6$

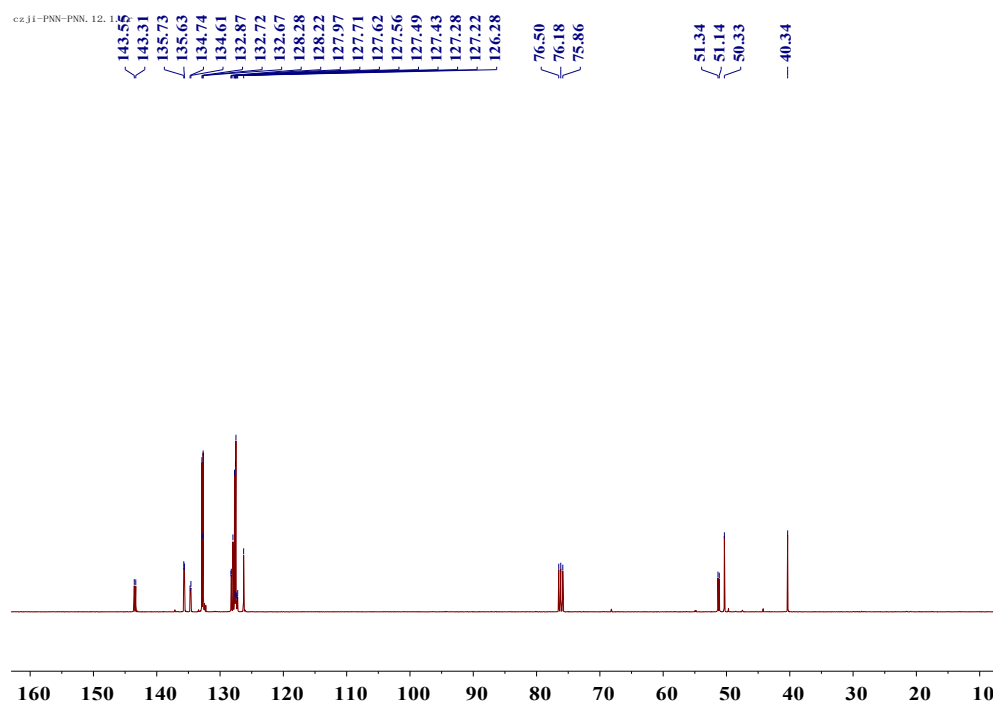

**Figure S8.**  $^{13}\text{C}$  NMR of PNN,  $\text{CDCl}_3$

exj-PNN-1115-1.2.fid

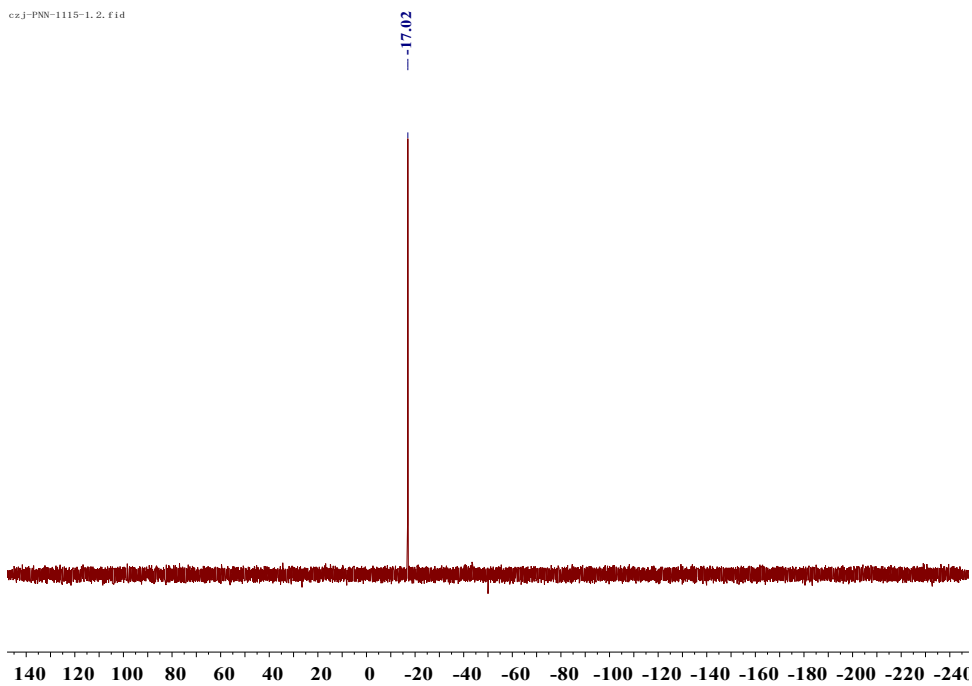

Figure S9. <sup>31</sup>P NMR of PNN, DMSO-d6

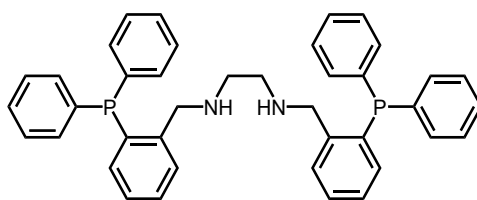

L4

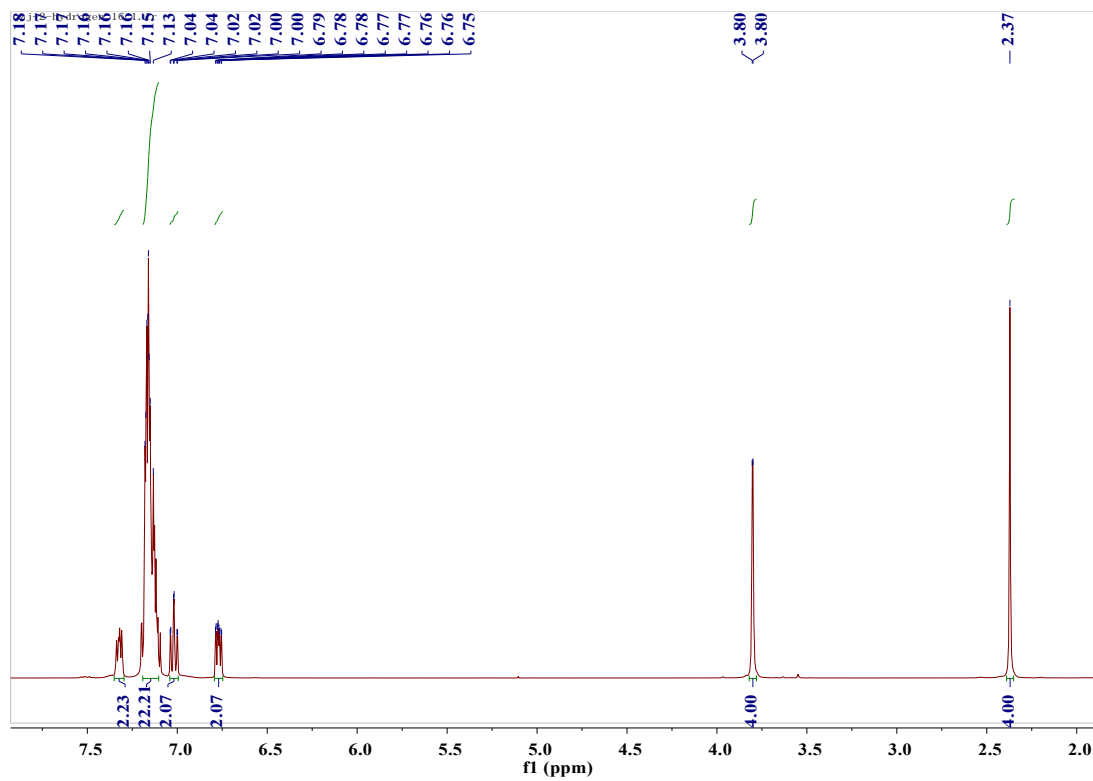

Figure S10. <sup>1</sup>H NMR of L4, CDCl<sub>3</sub>

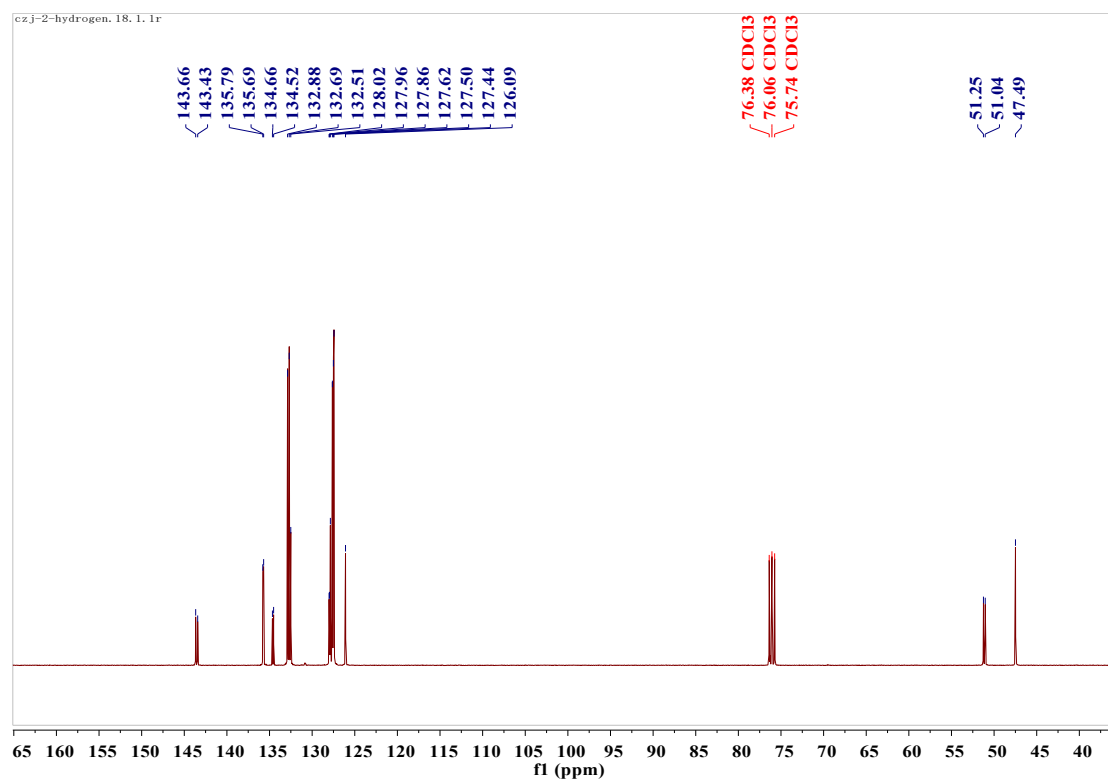

**Figure S11.**  $^{13}\text{C}$  NMR of L4,  $\text{CDCl}_3$

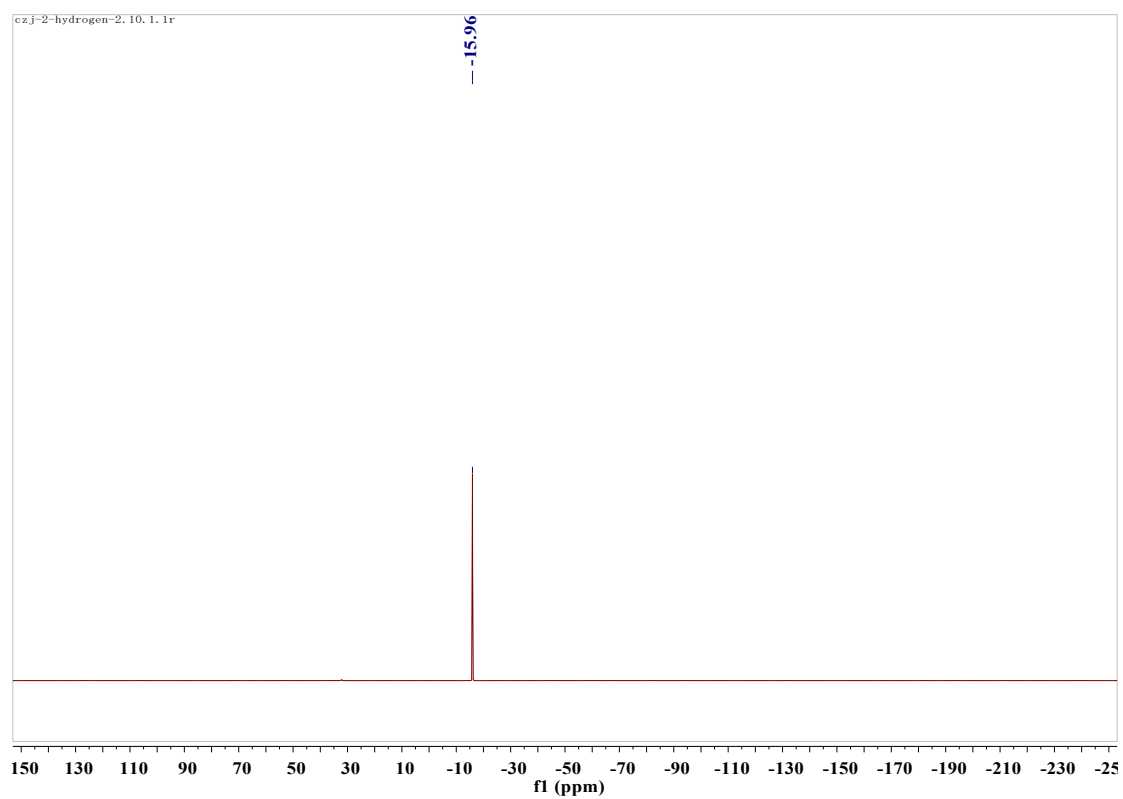

**Figure S12.**  $^{31}\text{P}$  NMR of L4,  $\text{CDCl}_3$

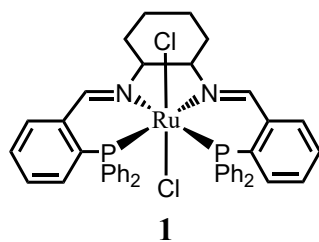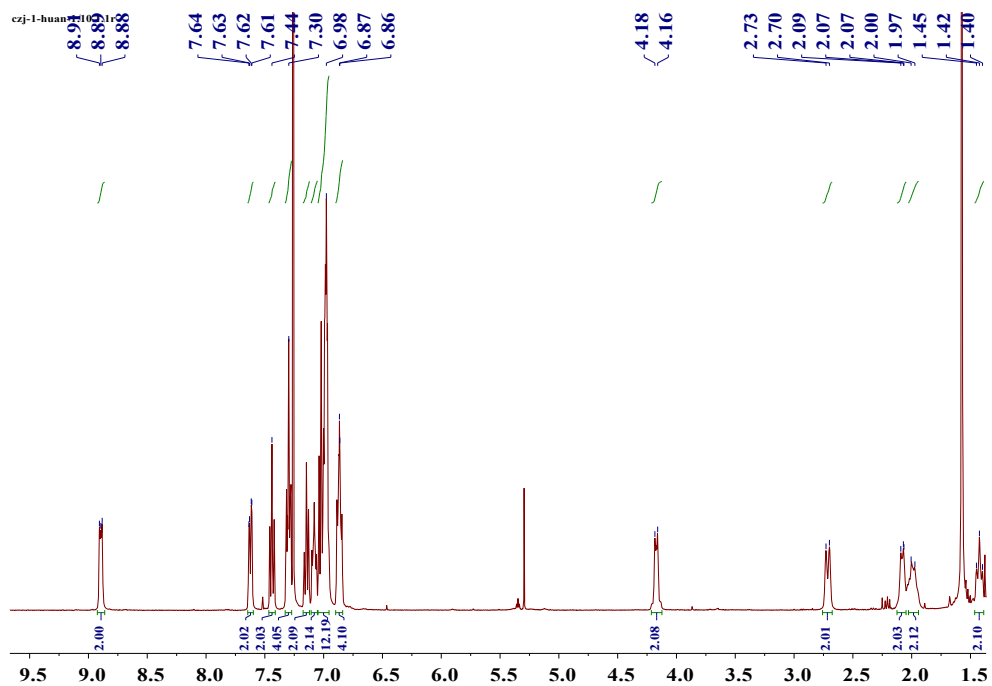

**Figure S13.**  $^1\text{H}$  NMR of **1**,  $\text{CDCl}_3$

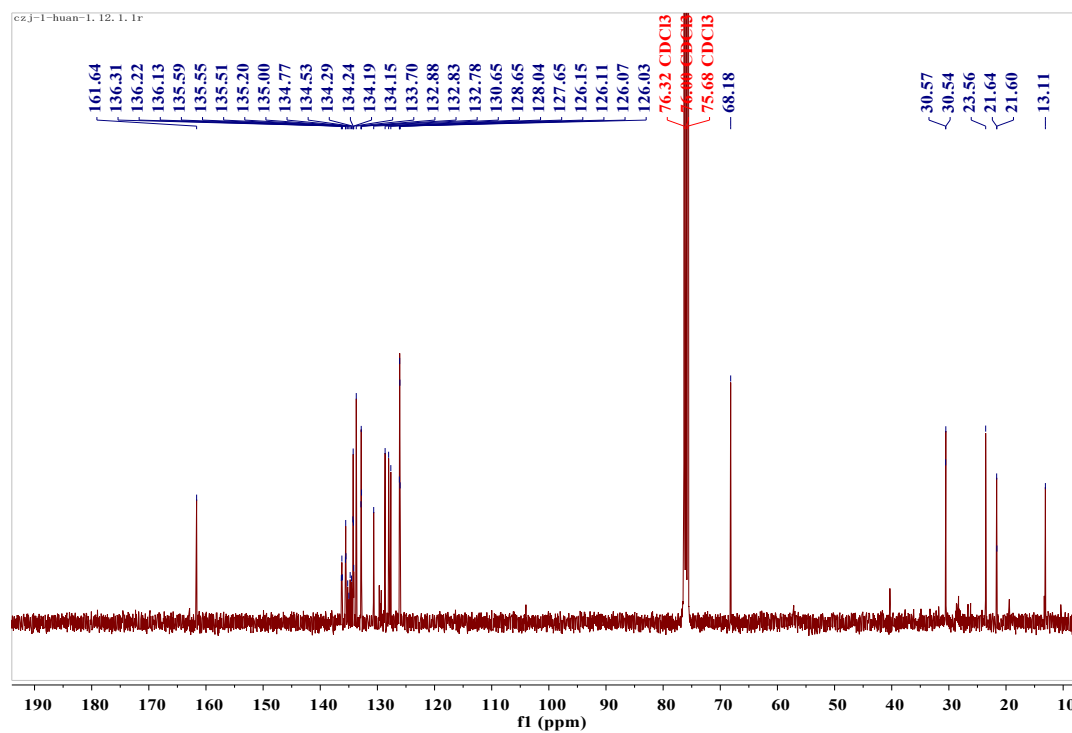

**Figure S14.**  $^{13}\text{C}$  NMR of **1**,  $\text{CDCl}_3$



— 47.36

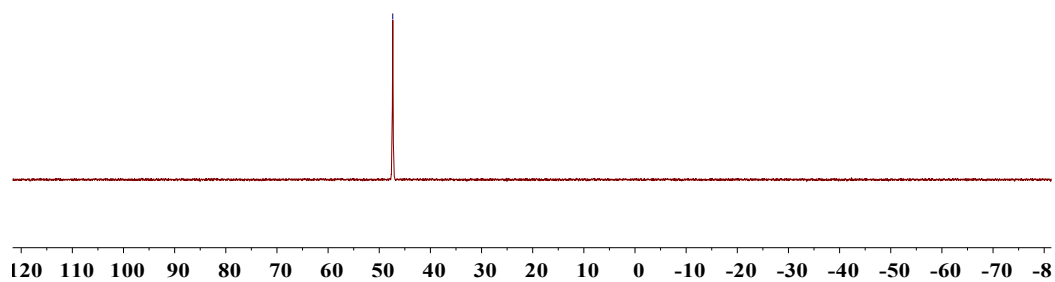

Figure S15.  $^{31}\text{P}$  NMR of **1**,  $\text{CDCl}_3$

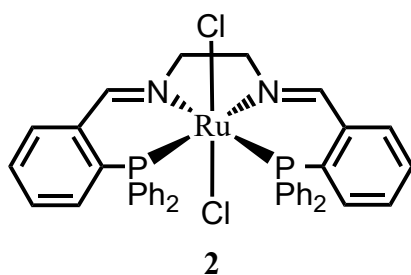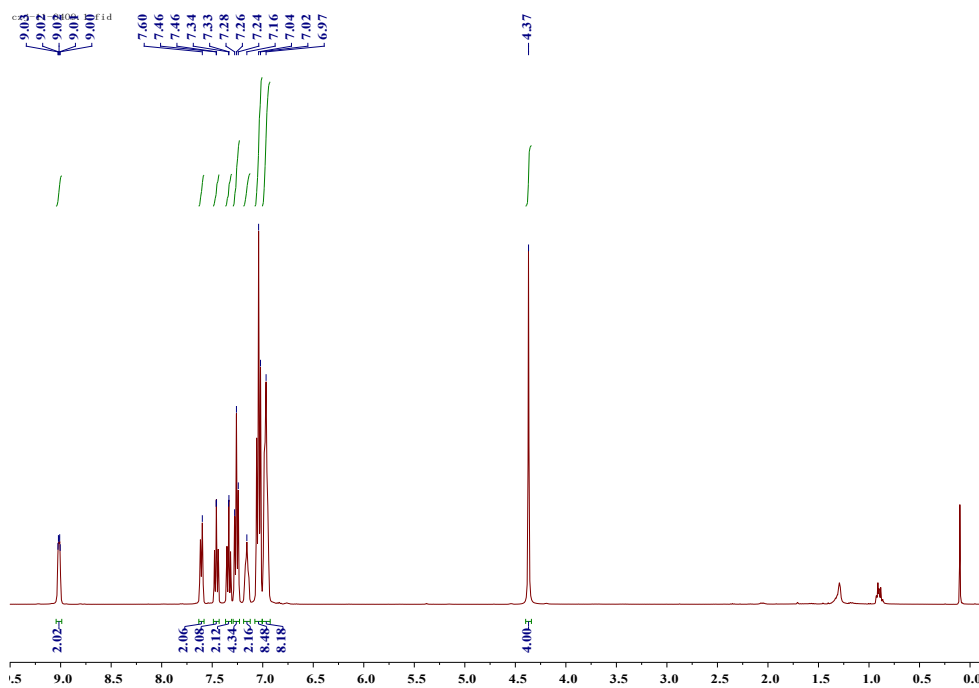

Figure S16.  $^1\text{H}$  NMR of **2**,  $\text{CDCl}_3$

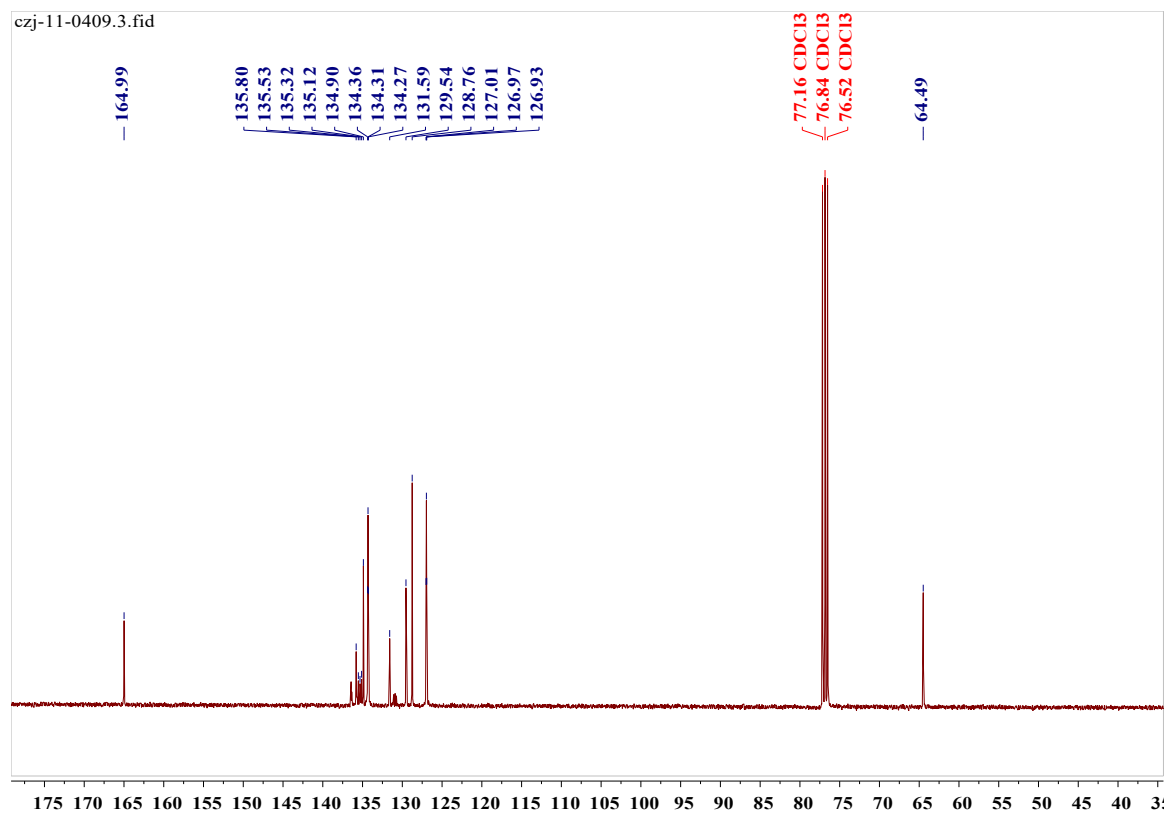

Figure S17.  $^{13}\text{C}$  NMR of 2,  $\text{CDCl}_3$

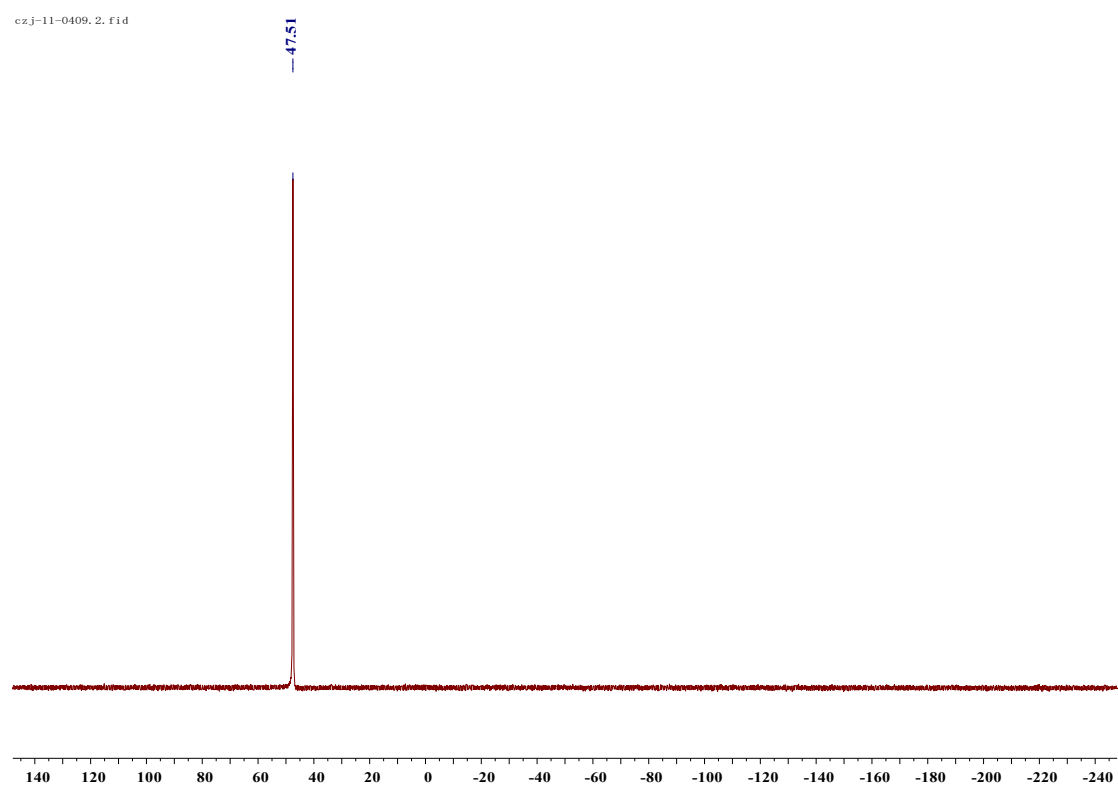

Figure S18.  $^{31}\text{P}$  NMR of 2,  $\text{CDCl}_3$

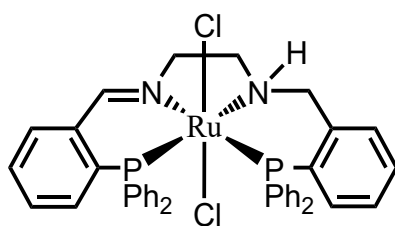

**3**

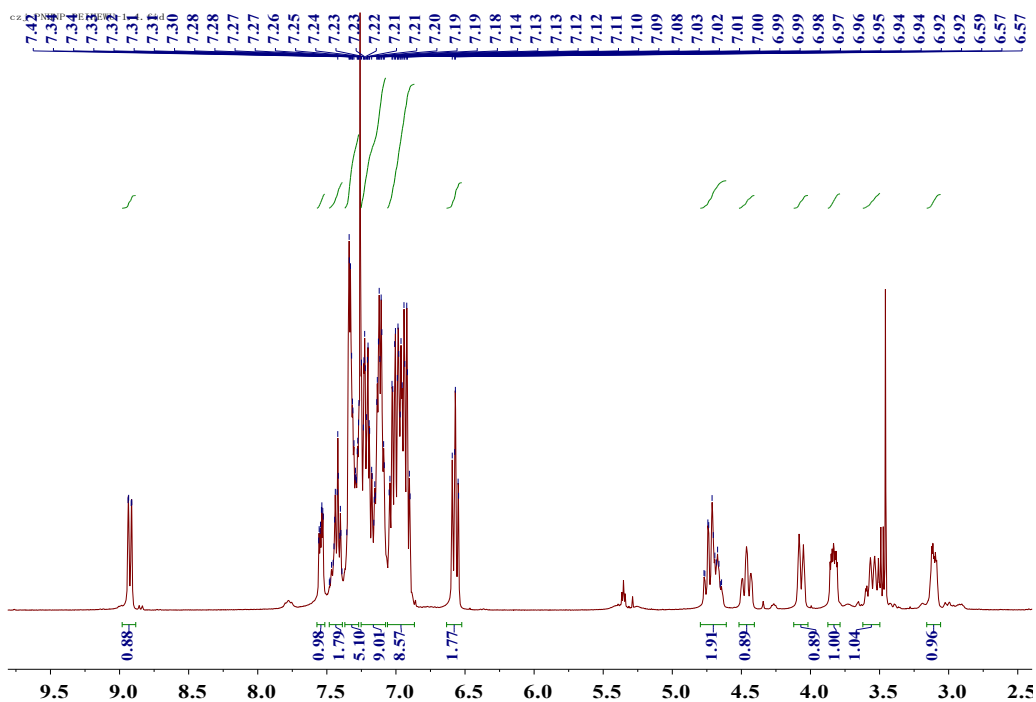

Figure S19. <sup>1</sup>H NMR of **3**, CDCl<sub>3</sub>

— 53.26  
— 38.23

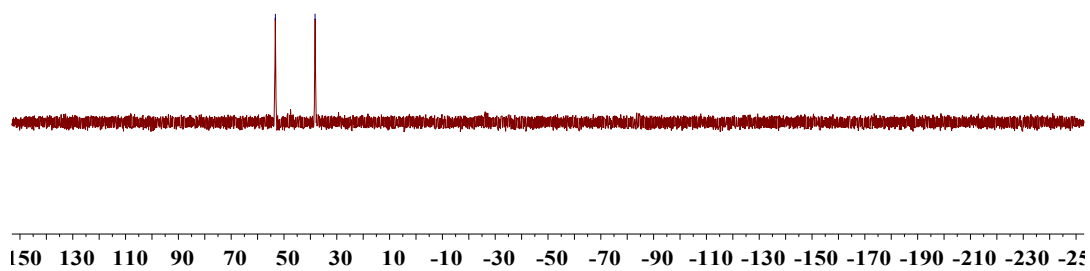

Figure S20.  $^{31}\text{P}$  NMR of **3**,  $\text{CDCl}_3$   
(a)  $^1\text{H}$ - $^1\text{H}$  2D-nosy

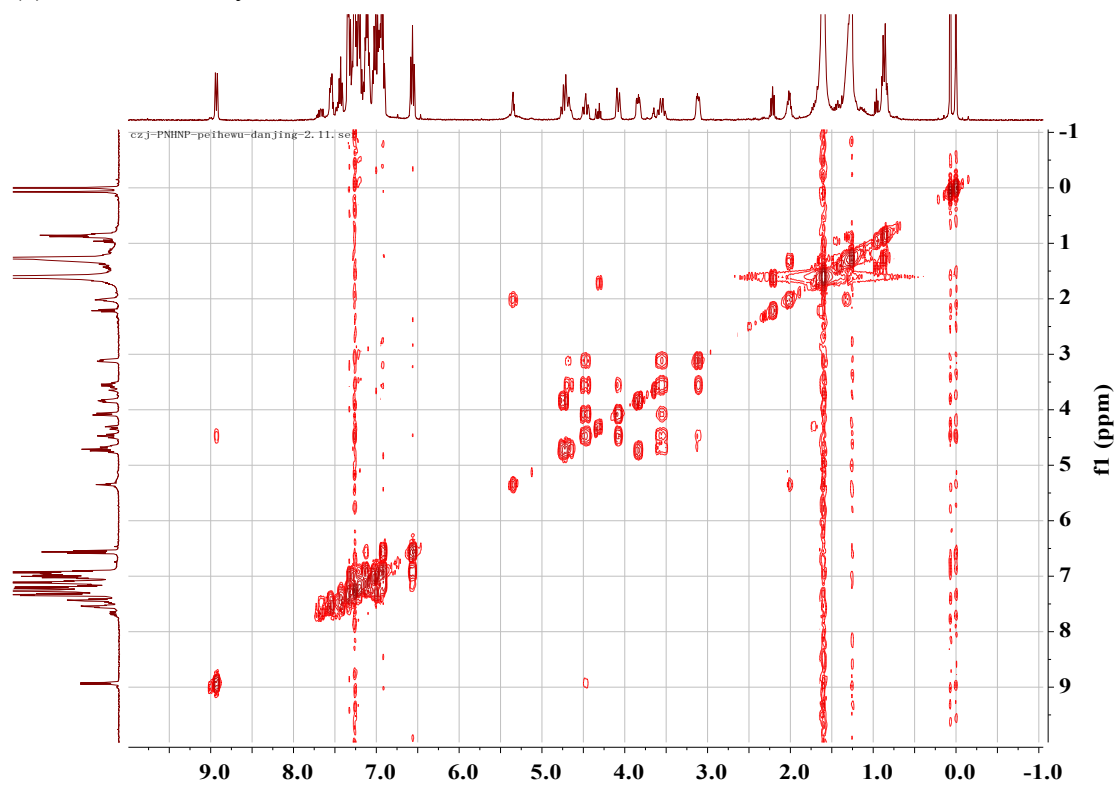

(b)  $^1\text{H}$ - $^1\text{H}$  2D-nosy partial enlarged view.

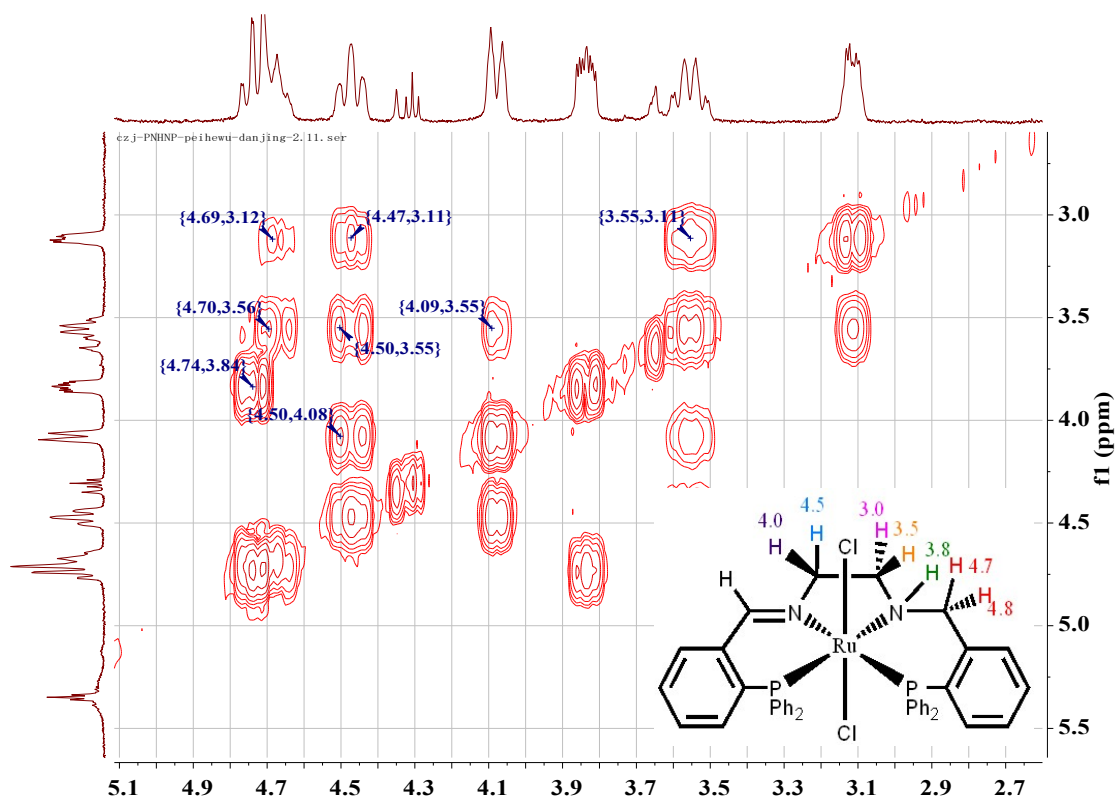

Figure S21.  $^1\text{H}$ - $^1\text{H}$  2D-nosy spectrum of 3.

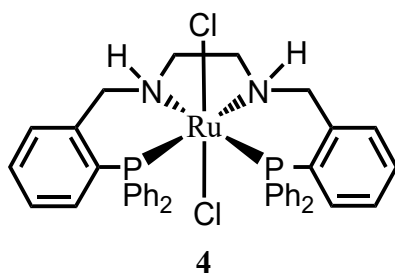

4

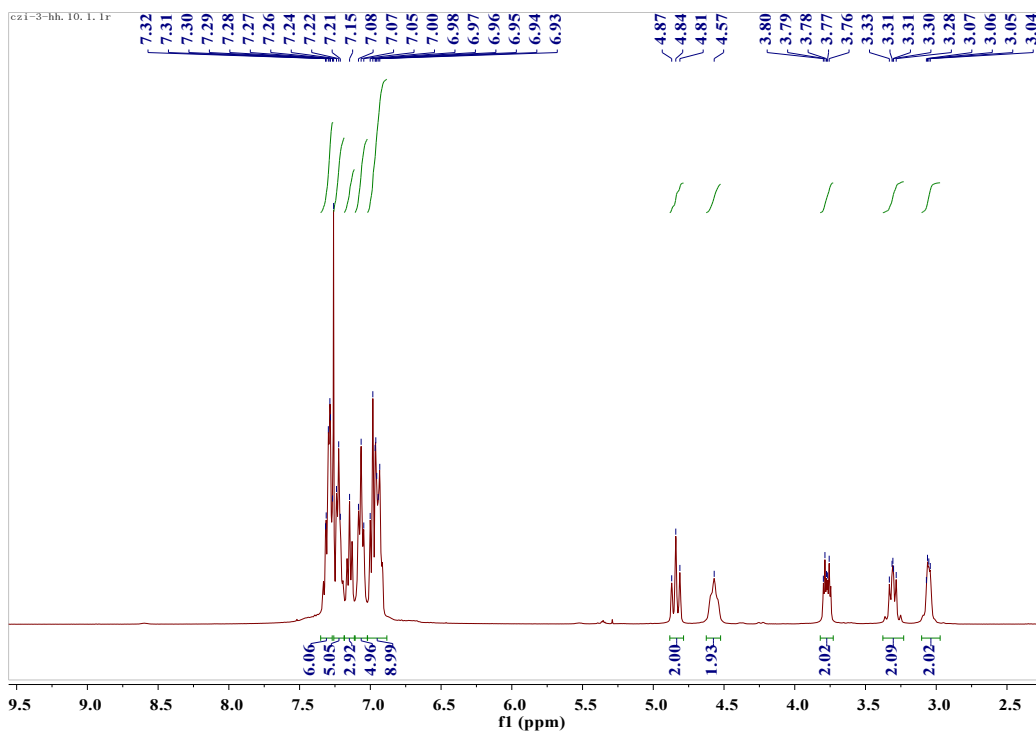

Figure S22.  $^1\text{H}$  NMR of 4,  $\text{CDCl}_3$

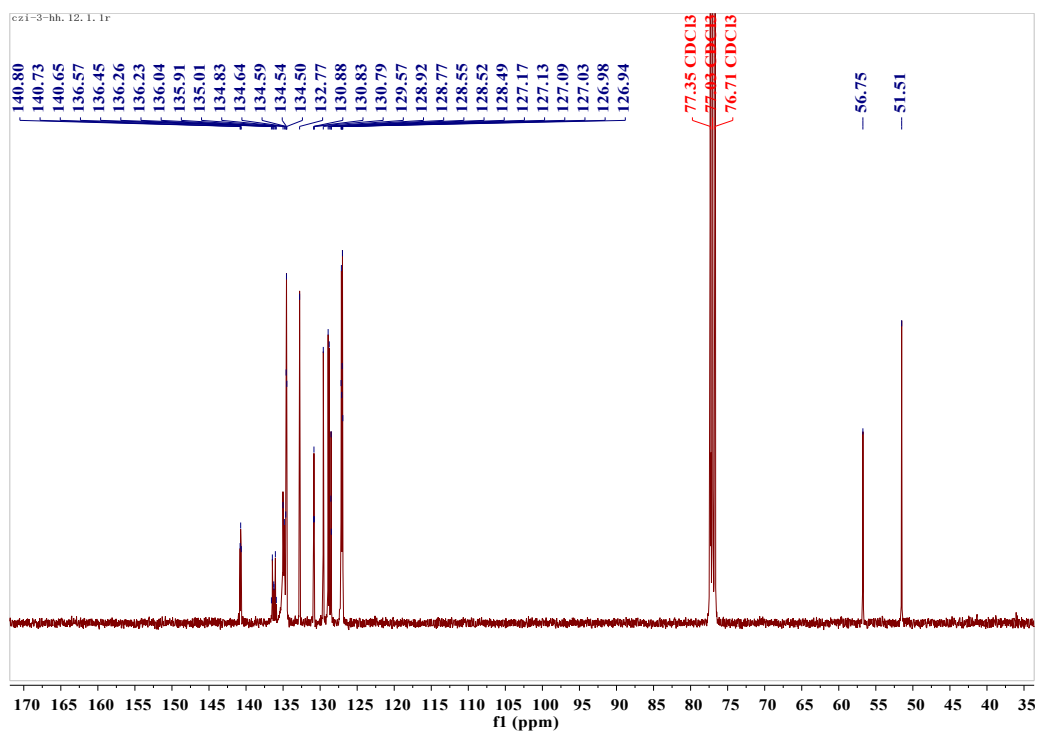

Figure S23.  $^{13}\text{C}$  NMR of 4,  $\text{CDCl}_3$

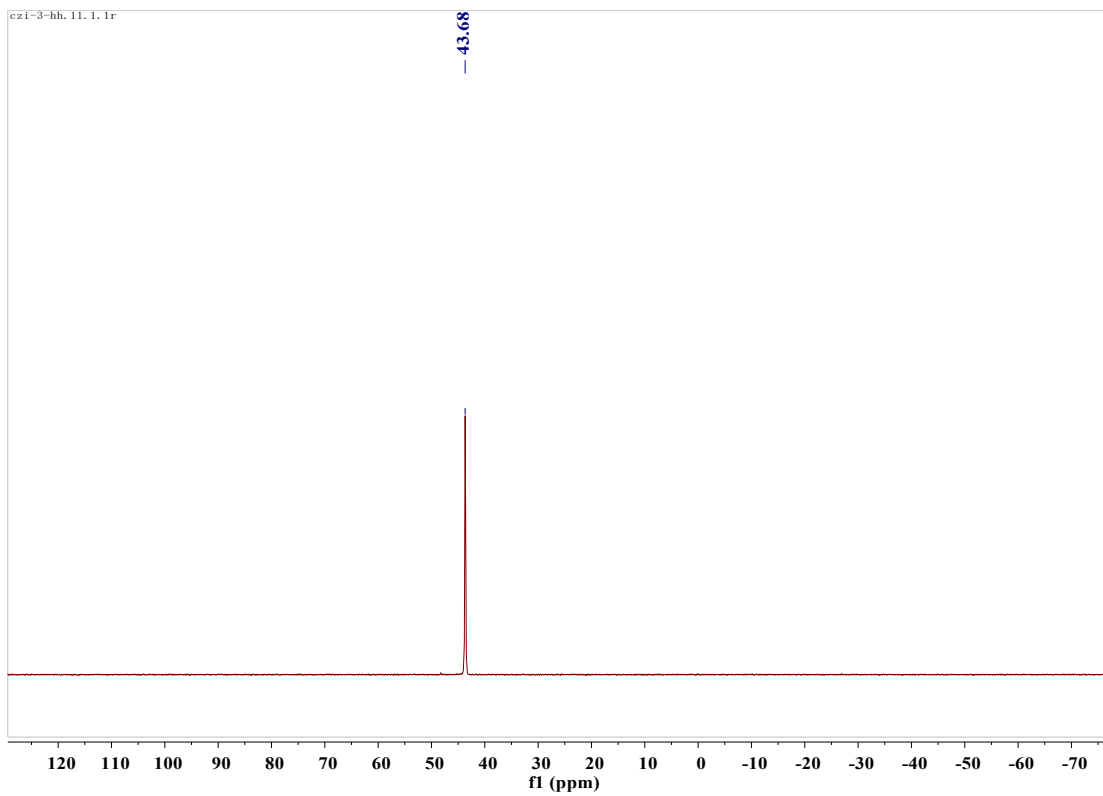

**Figure S24.**  $^{31}\text{P}$  NMR of **4**,  $\text{CDCl}_3$ .

## Supplementary Figures

### Report

**Analysis Data:** D:\Data\Method\Test-20181030-1.50 - CH4-6.42.met  
**Data File:** D:\Data\Result\czj\czj-1-8bi1-yea-11.rsl\czj-1-8bi1-yea-11.dat zhijian  
**User:** chen  
**Acquisition:** 2021/1/8 17:20:27 (GMT +08:00)  
**Print time:** 2021/1/8 17:32:45 (GMT +08:00)

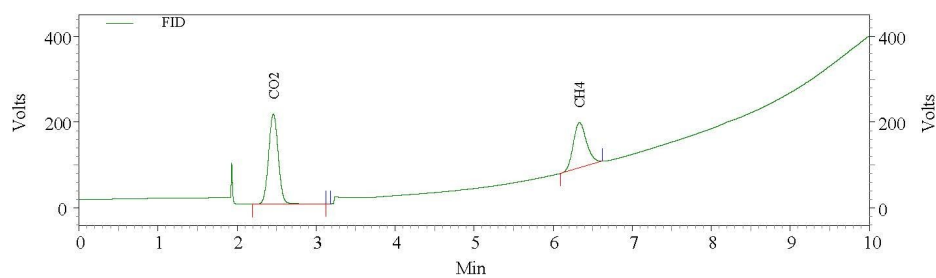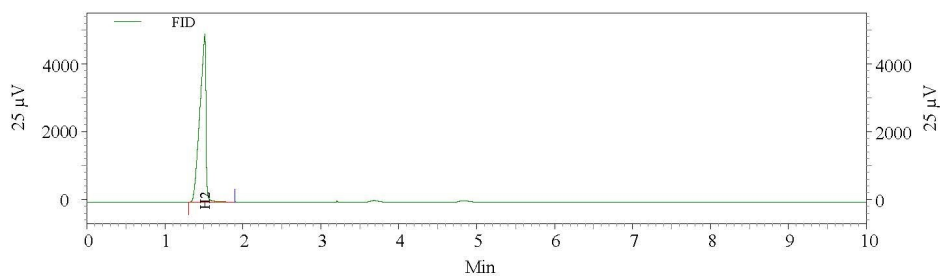

| FID result | peak#name | retation time | Area     | Amount / %       |
|------------|-----------|---------------|----------|------------------|
|            | 1 CO2     | 2.460         | 13599098 | <b>0.021</b>     |
|            | 3 CH4     | 6.333         | 9454863  | <b>0.014</b>     |
|            | CO        |               |          | <b>0.000 BDL</b> |

| Aggregate |  |  | 23053961 | <b>0.036</b> |
|-----------|--|--|----------|--------------|
|-----------|--|--|----------|--------------|

| FID result | peak#name | retation time | Area      | Amount / %    |
|------------|-----------|---------------|-----------|---------------|
|            | 1 H2      | 1.510         | 204959613 | <b>12.669</b> |

| Aggregate |  |  | 204959613 | <b>12.669</b> |
|-----------|--|--|-----------|---------------|
|-----------|--|--|-----------|---------------|

**Figure S25.** GC data for APRM reaction using 8 ml MeOH, 2 ml H<sub>2</sub>O, and 4 µmol **2**.  
 $T_{\text{set}} = 120\text{ }^{\circ}\text{C}$ , 5 hours.



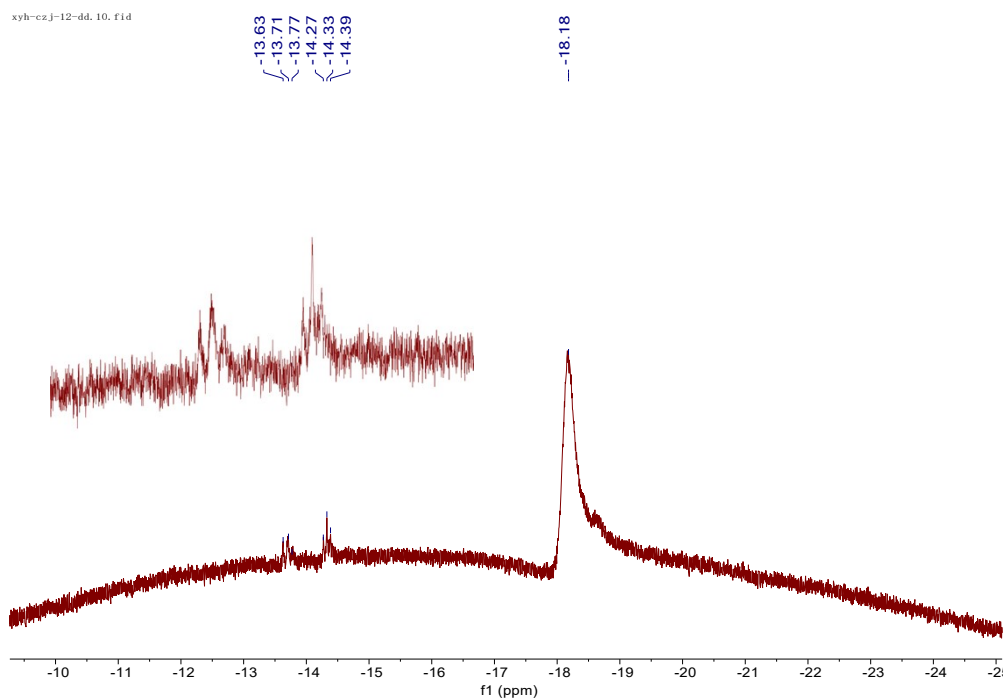

**Figure S26.**  $^1\text{H}$  NMR ( $d^6$ -DMSO) of the reaction mixture. Reaction condition:  $\text{CH}_3\text{OH}/\text{H}_2\text{O}$  (8:2 v/v, 3mL), KOH (8 M), triglyme (1 mL), **2** (10  $\mu\text{mol}$ ) for 1 hour. Inset: Magnified chemical-shift window between -15 ppm and -13 ppm.

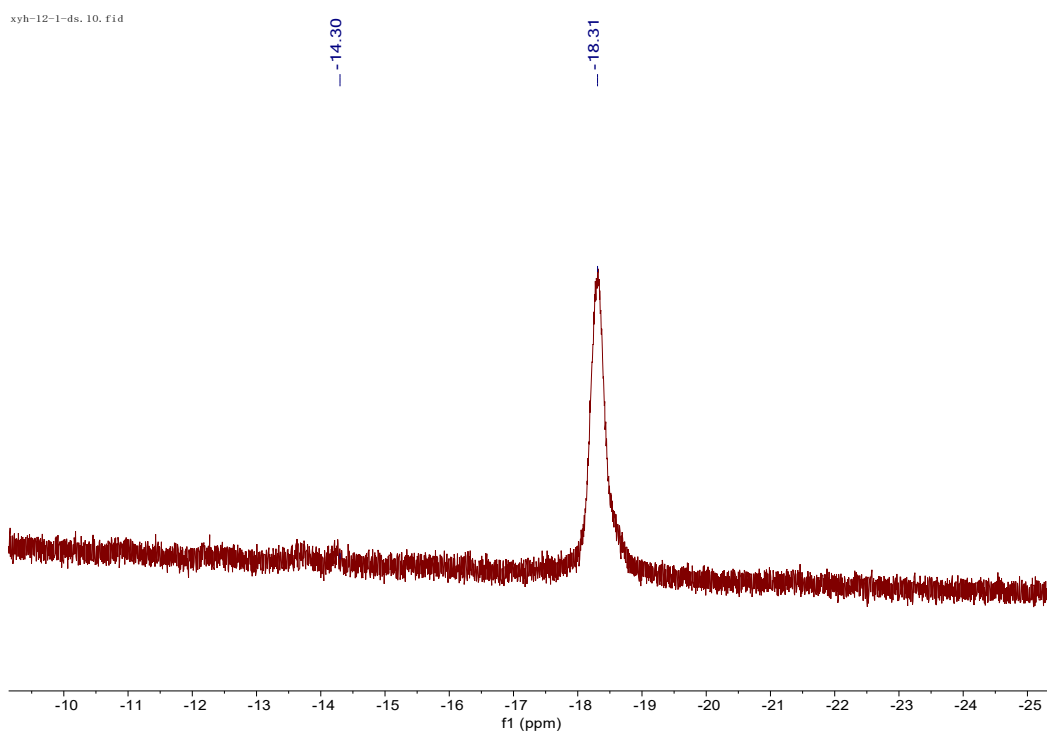

**Figure S27.**  $^1\text{H}$  NMR ( $d^6$ -DMSO) of the reaction mixture. Reaction condition:  $\text{CH}_3\text{OH}/\text{H}_2\text{O}$  (8:2 v/v, 3mL), KOH (8 M), triglyme (1 mL), **3** (10  $\mu\text{mol}$ ) for 1 hour.

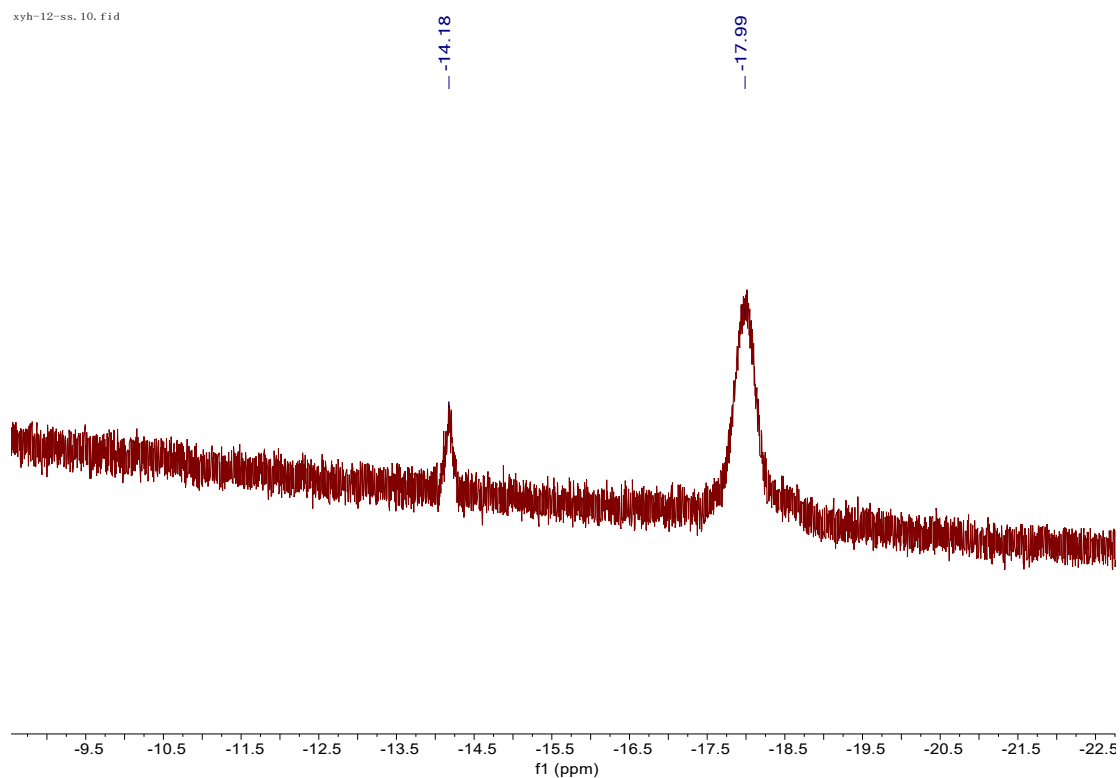

**Figure S28.**  $^1\text{H}$  NMR ( $d^6$ -DMSO) of the reaction mixture. Reaction condition:  $\text{CH}_3\text{OH}/\text{H}_2\text{O}$  (8:2 v/v, 3 mL), KOH (8 M), triglyme (1 mL), **4** (10  $\mu\text{mol}$ ) for 1 hour.

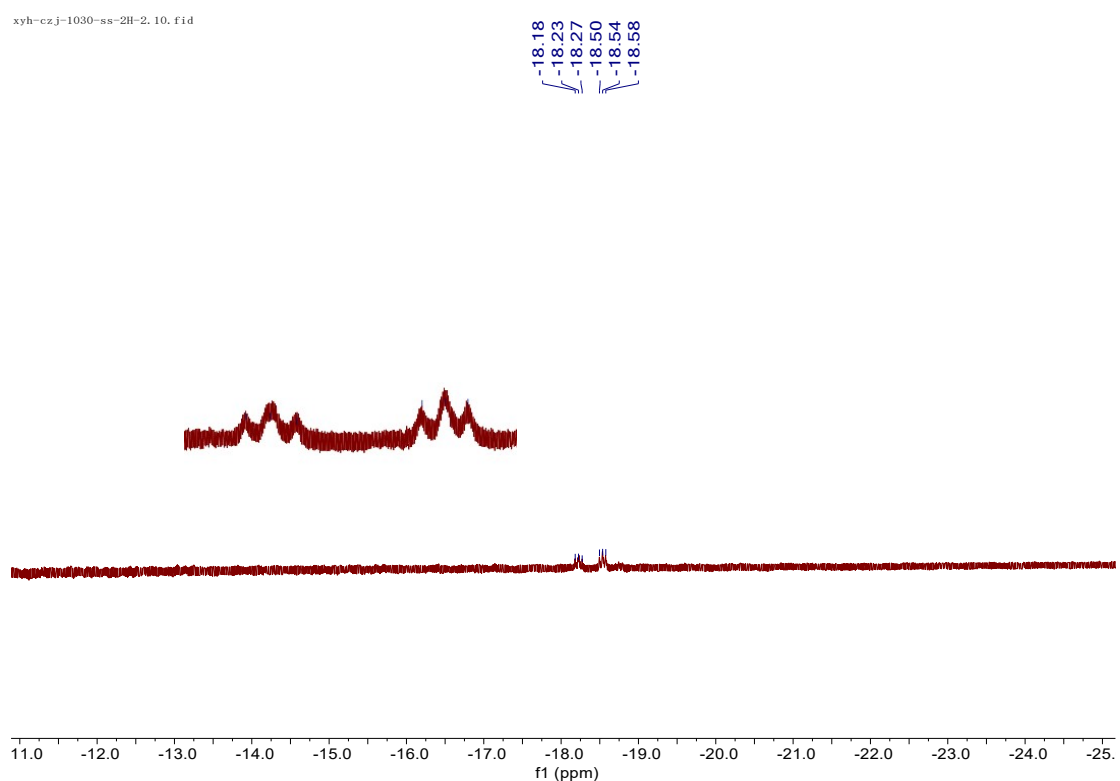

**Figure S29.**  $^1\text{H}$  NMR ( $d^6$ -DMSO) of the reaction mixture for 2 hours with **4** (10  $\mu\text{mol}$ ) and 2 equivalent  $\text{NaBEt}_3\text{H}$  in 1 mL of triglyme at 80  $^\circ\text{C}$ . Inset: Magnified chemical-shift window between -19 ppm and -18 ppm.

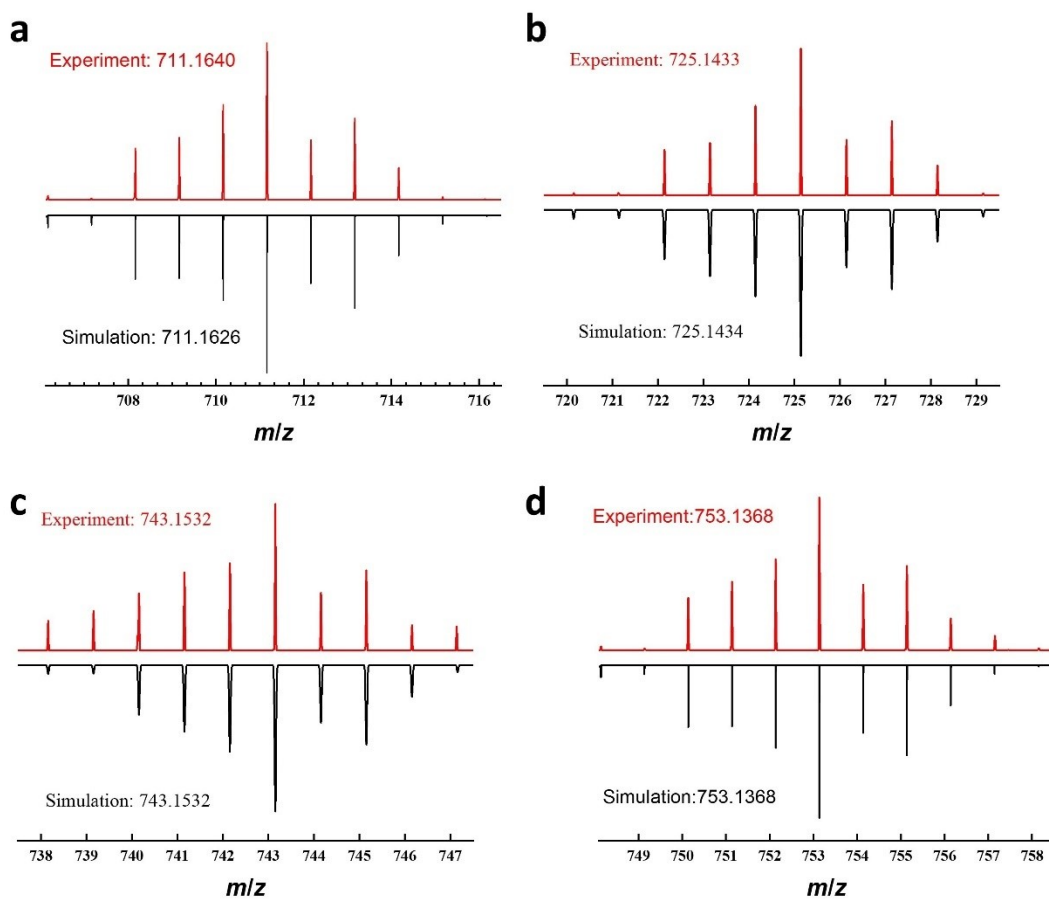

**Figure S30.** The found intermediates in HRESI-MS of the reaction solution using **2**, together with the simulated plots.

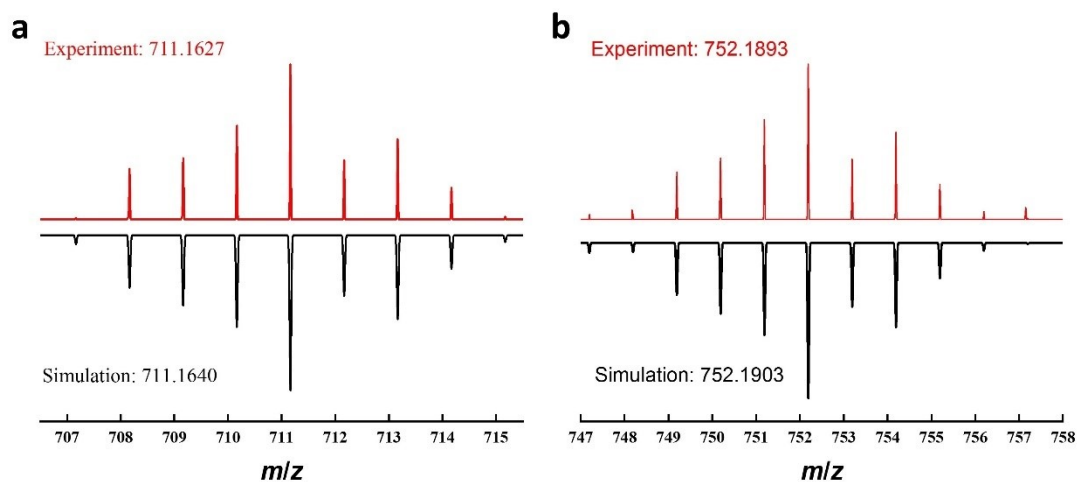

**Figure S31.** The found intermediates in HRESI-MS of the reaction solution using **3**,

together with the simulated plots.

xyh-cz-j-H2-500-pz. 11. fid

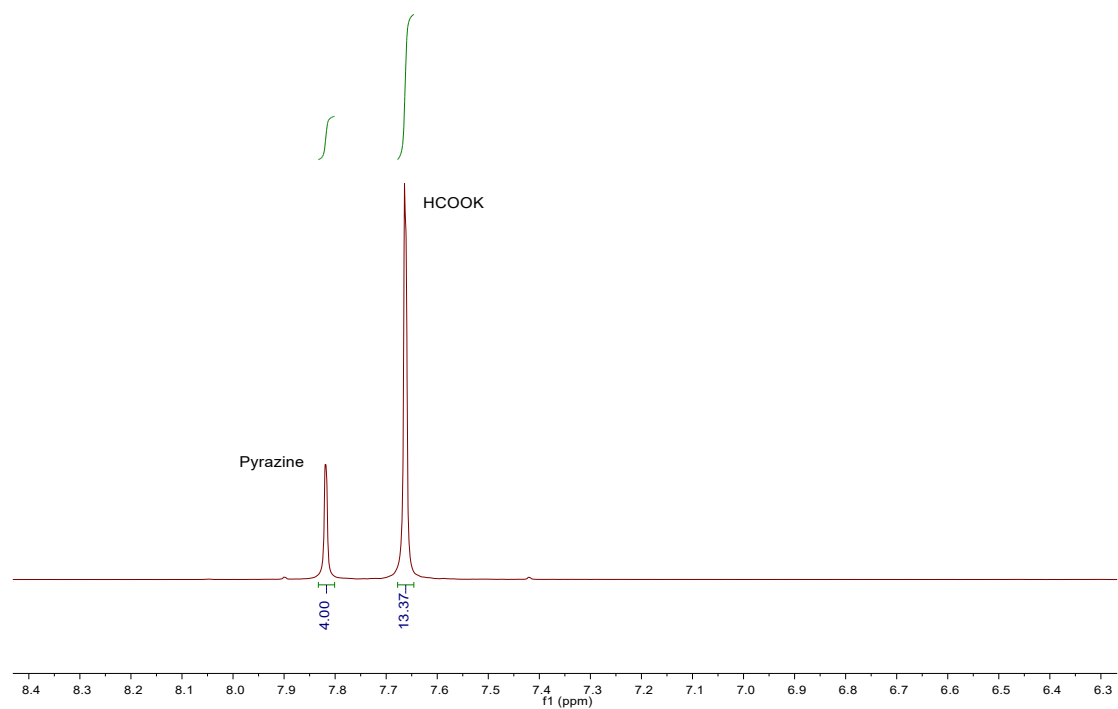

xyh-cz-j-H2-500-pz. 12. fid

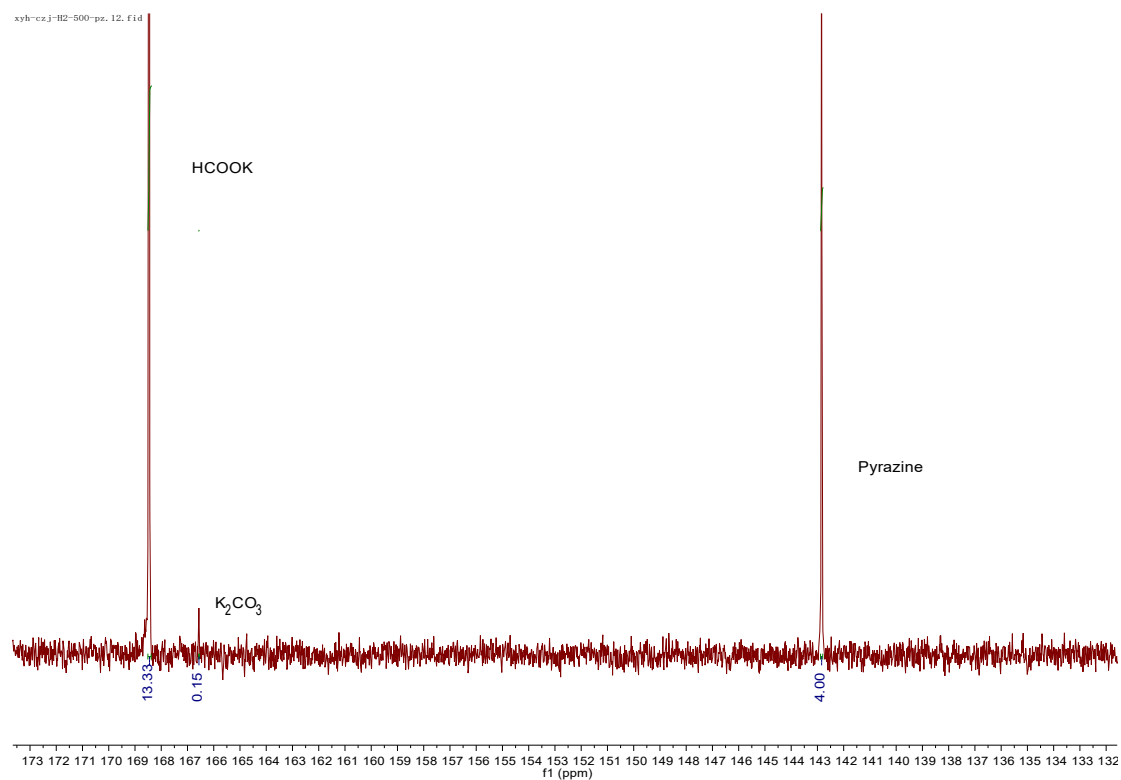

**Figure S32** The quantitative <sup>1</sup>H NMR and quantitative <sup>13</sup>C NMR of reaction mixture. CH<sub>3</sub>OH/H<sub>2</sub>O (8:2 v/v, 10mL), 8 M KOH, 500 mL H<sub>2</sub> generated, entry 1 in Table S3.

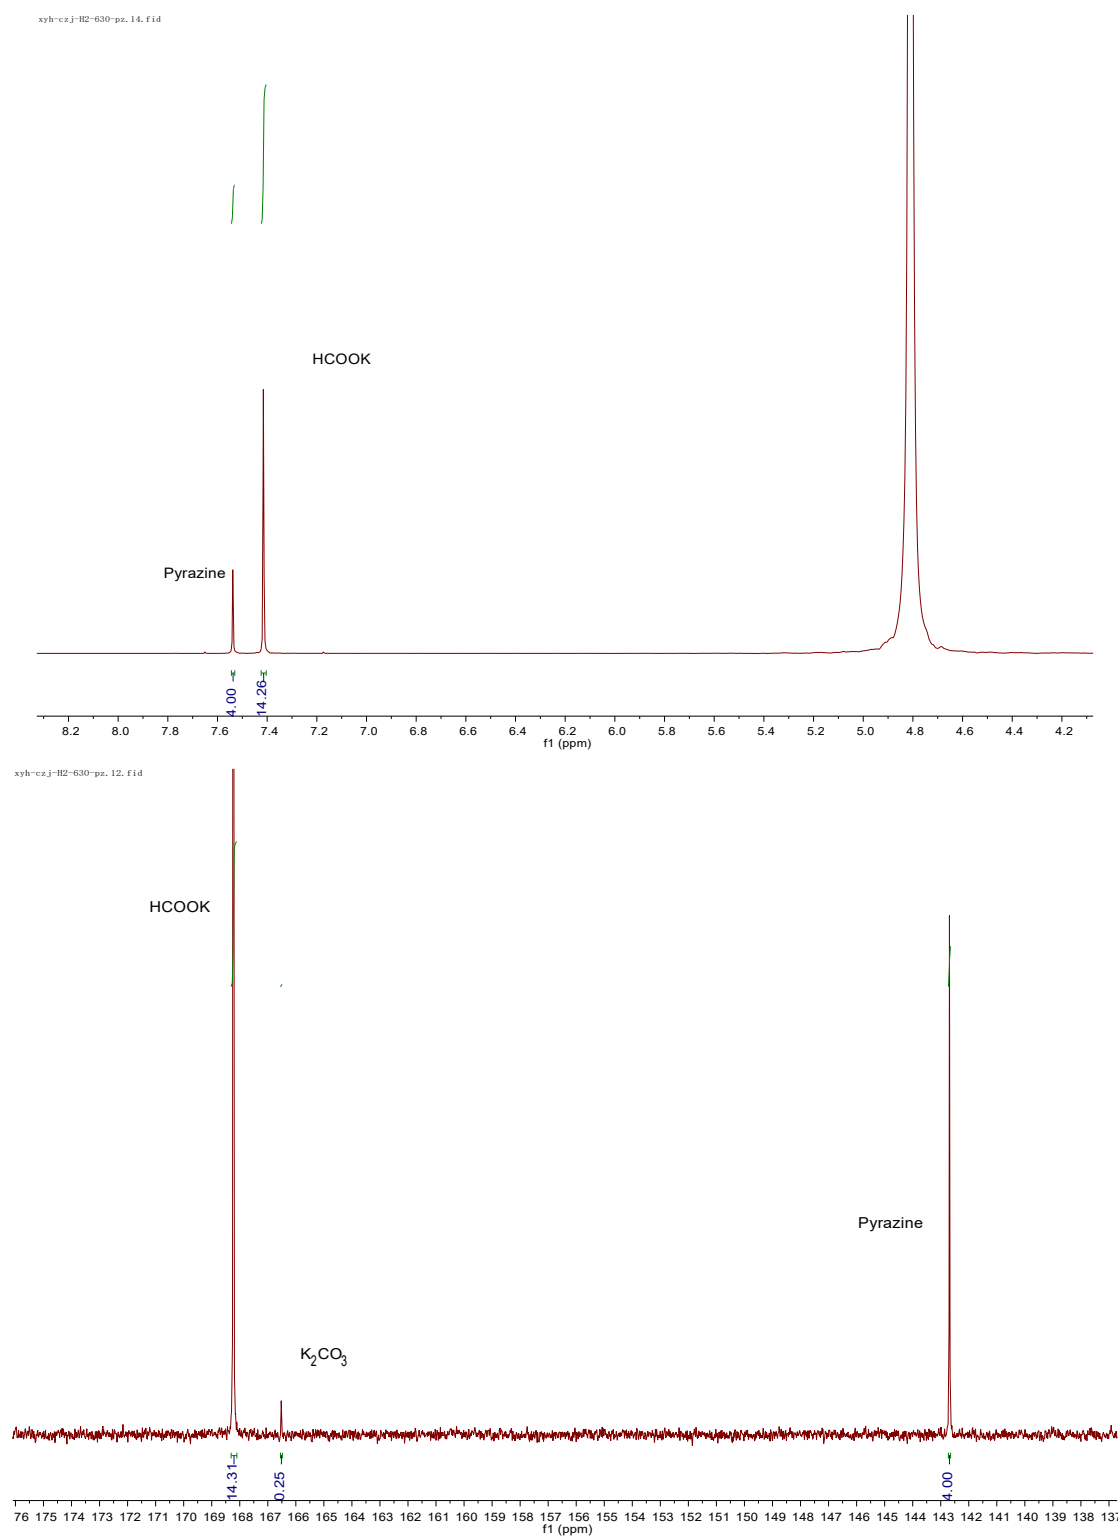

**Figure S33.** The quantitative  $^1\text{H}$  NMR and quantitative  $^{13}\text{C}$  NMR of reaction mixture.  $\text{CH}_3\text{OH}/\text{H}_2\text{O}$  (8:2 v/v, 10mL), 8 M KOH, 630 mL  $\text{H}_2$  generated, entry 2 in Table S3.

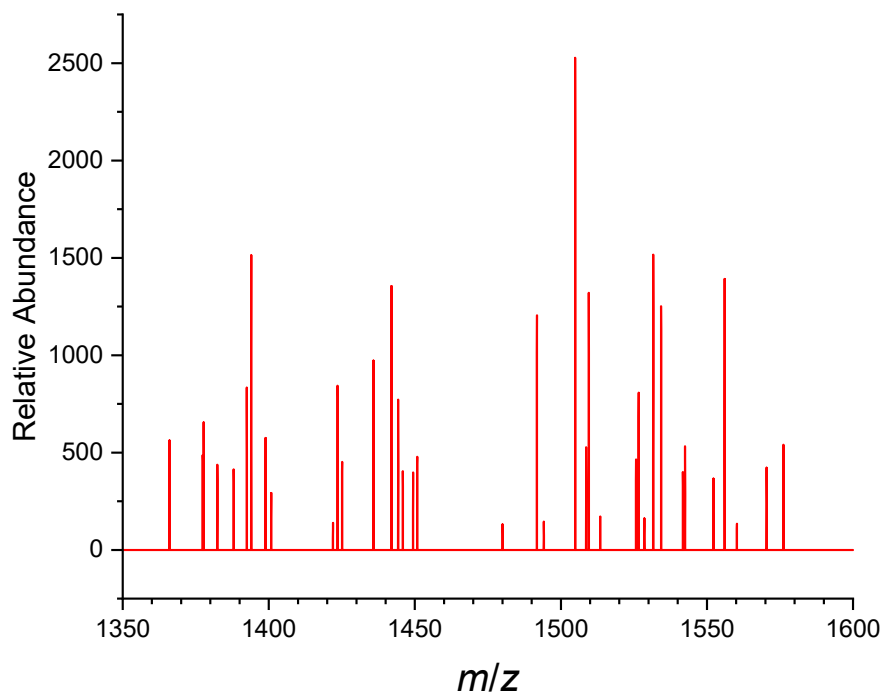

**Figure S34.** HRESI-MS of the reaction solution (1 h) using **2** in the range of 1350-1600 for  $m/z$ .

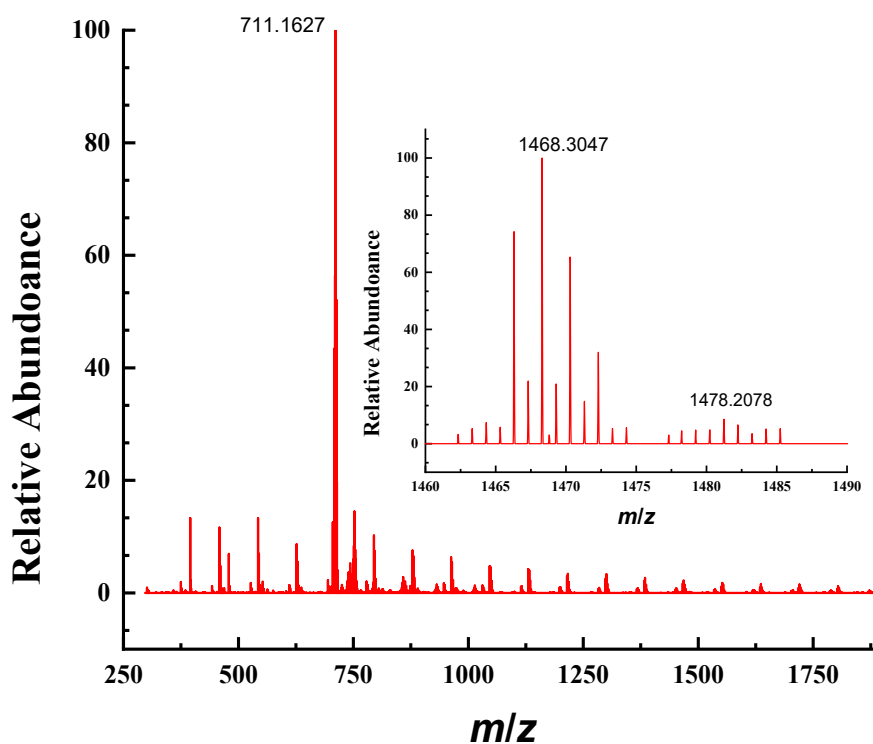

**Figure S35.** HRESI-MS of the reaction solution using **3** in the  $m/z$  range of 250-1900 (10 min). Insert: the partial magnified view in the indicated  $m/z$  range.

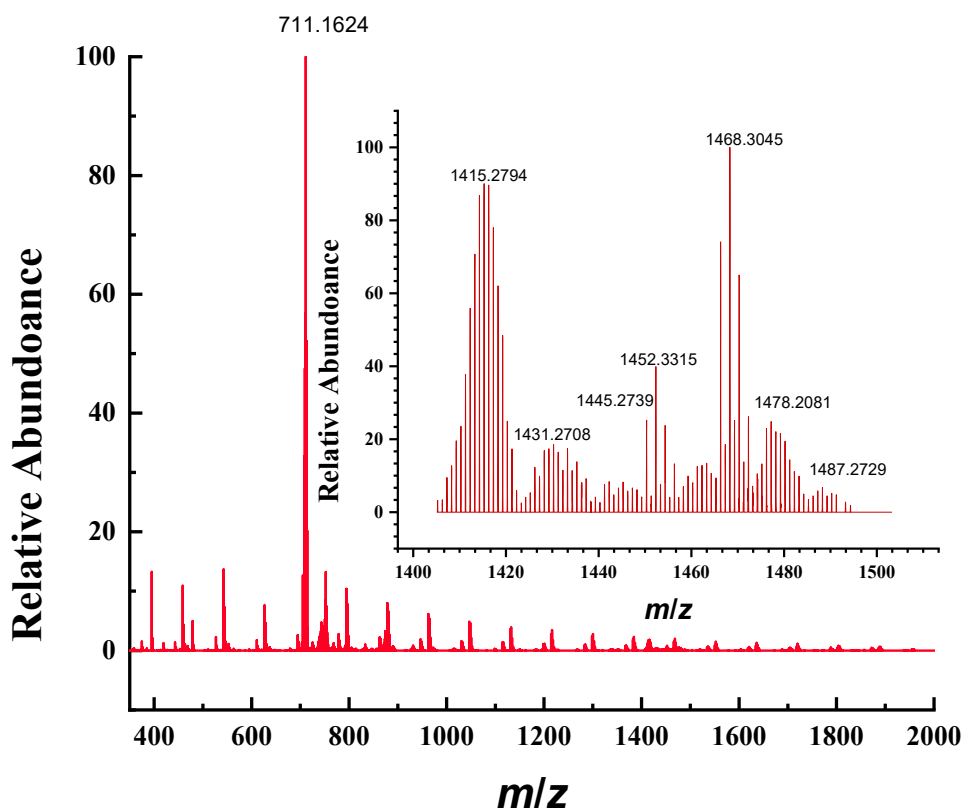

**Figure S36.** HRESI-MS of the reaction solution using **4** in the  $m/z$  range of 400-2000 (10 min). Insert: the partial magnified view in the indicated  $m/z$  range.

## Supplementary Tables

**Table S1.** Selection of different bases for APRM reaction catalysed by **2**.

| entry | Base                           | Inner $T / ^\circ\text{C}$ | TON  |      |      |      |      |
|-------|--------------------------------|----------------------------|------|------|------|------|------|
|       |                                |                            | 1h   | 2h   | 3h   | 4h   | 5h   |
| 1     | 0.12 mol EtONa                 | 103                        | 21   | -    | -    | -    | -    |
| 2     | 0.05 mol $t\text{BuOK}$        | 88                         | 10   | 41   | 72   | 93   | 109  |
| 3     | 8 M HCOOK                      | 84                         | 59   | 78   | 98   | 105  | 121  |
| 4     | 8 M HCOONa                     | 103                        | 8    | 27   | -    | -    | -    |
| 5     | 8 M NaOH                       | 100                        | 129  | 191  | 227  | 253  | 279  |
| 6     | 8 M KOH                        | 112                        | 1066 | 1558 | 1884 | 2138 | 2319 |
| 7     | 0.05 mol $\text{Et}_3\text{N}$ | 76                         | 50   | -    | -    | -    | -    |

[a] Reaction conditions: MeOH/ $\text{H}_2\text{O}$  = 8:2 (10 mL), triglyme (5 mL), catalyst (4  $\mu\text{mol}$ ), 5 hours,  $T_{\text{Set}} = 120^\circ\text{C}$ .

**Table S2.** Dehydrogenation of ethanol, glycol and formic catalyzed by **2**.

| Entry | TON           |               |             |
|-------|---------------|---------------|-------------|
| 1     | 5072 (1 h)    | 9196 (3 h)    | 12907 (5 h) |
| 2     | 2686 (20 min) | 5134 (40 min) | 6706 (1 h)  |
| 3     | 401 (1 h)     | 746 (3 h)     | 1136 (5 h)  |
| 4     | 878 (1 h)     | 4070 (3 h)    | 4473 (5 h)  |

[a] Reaction condition: (1) 8 ml EtOH, 2 ml H<sub>2</sub>O, 5 ml triglyme, 8M KOH, 1 μmol catalyst, 100 °C; (2) 8 ml EtOH, 2 ml H<sub>2</sub>O, 5 ml triglyme, 8M KOH, 4 μmol catalyst, 120 °C; (3) 8 ml glycol, 2 ml H<sub>2</sub>O, 5 ml triglyme, 8M KOH, 4 μmol catalyst, 120 °C; (4) 8 ml HCOOH, 20 ml triethylamine, 2 ml triglyme, 1 μmol catalyst, 120 °C.

**Table S3.** Comparison of hydrogen generation calculated from HCOOK and K<sub>2</sub>CO<sub>3</sub> production with it from quantitative <sup>1</sup>H NMR and quantitative <sup>13</sup>C NMR through two independent experiments.

| Entry | <i>V</i> (H <sub>2</sub> )/mL | H <sub>2</sub> generation | H <sub>2</sub> generation                          | Deviation <sup>c</sup> |
|-------|-------------------------------|---------------------------|----------------------------------------------------|------------------------|
|       |                               | calculated from HCOOK/mL  | calculated from K <sub>2</sub> CO <sub>3</sub> /mL |                        |
| 1     | 500                           | 491 <sup>a</sup>          | 8.29 <sup>b</sup>                                  | 0.142%                 |
|       |                               | 493 <sup>b</sup>          | 8.29 <sup>b</sup>                                  | 0.258%                 |
| 2     | 630                           | 618 <sup>a</sup>          | 16.3 <sup>b</sup>                                  | 0.682%                 |
|       |                               | 621 <sup>b</sup>          | 16.3 <sup>b</sup>                                  | 1.16%                  |

Reaction conditions: CH<sub>3</sub>OH/H<sub>2</sub>O (8:2 v/v, 10mL), KOH (8 M). a. quantitative <sup>1</sup>H NMR; b. quantitative <sup>13</sup>C NMR; c. the deviation was calculated by the differences between the amount of H<sub>2</sub> measured by using a gas burette and the combined volume calculated based on the amount of HCOOK and K<sub>2</sub>CO<sub>3</sub>.

**Scheme S1.** Aqueous-phase methanol reforming (APRM) process in the presence of KOH.

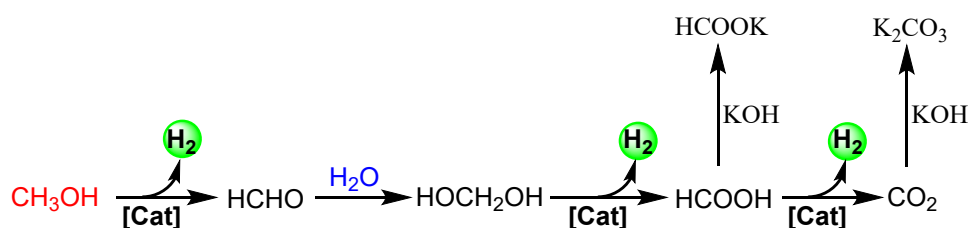



## Crystallography Information

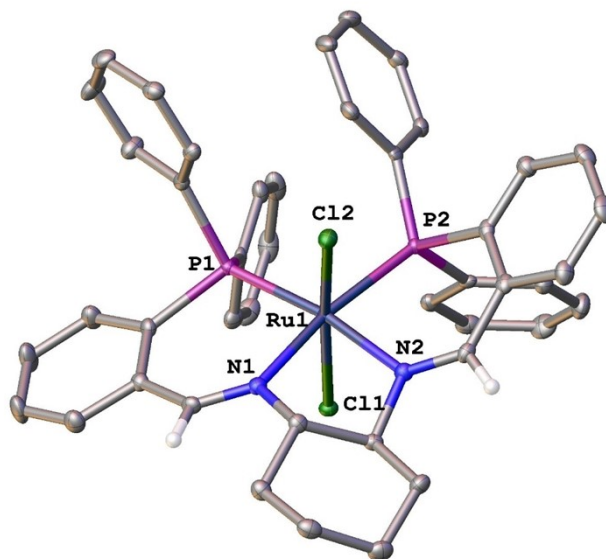

**Figure S30.** ORTEP diagrams of the molecular structures of **1**. Ellipsoids are set at 50% probability.

**Table S3. Crystal data and structure refinement for 1.**

| Identification code                    | <b>1</b>                                                                         |
|----------------------------------------|----------------------------------------------------------------------------------|
| Empirical formula                      | C <sub>45</sub> H <sub>42</sub> Cl <sub>4</sub> N <sub>2</sub> P <sub>2</sub> Ru |
| Formula weight                         | 915.62                                                                           |
| Temperature/K                          | 101.84                                                                           |
| Crystal system                         | triclinic                                                                        |
| Space group                            | <i>P</i> -1                                                                      |
| <i>a</i> /Å                            | 10.7329(4)                                                                       |
| <i>b</i> /Å                            | 12.9445(5)                                                                       |
| <i>c</i> /Å                            | 14.7579(5)                                                                       |
| $\alpha$ /°                            | 93.7350(10)                                                                      |
| $\beta$ /°                             | 98.0700(10)                                                                      |
| $\gamma$ /°                            | 91.9380(10)                                                                      |
| Volume/Å <sup>3</sup>                  | 2023.81(13)                                                                      |
| <i>Z</i>                               | 2                                                                                |
| $\rho_{\text{calc}}$ /cm <sup>3</sup>  | 1.503                                                                            |
| $\mu$ /mm <sup>-1</sup>                | 0.766                                                                            |
| <i>F</i> (000)                         | 936.0                                                                            |
| Crystal size/mm <sup>3</sup>           | 0.17 × 0.13 × 0.08                                                               |
| Radiation                              | MoK $\alpha$ ( $\lambda$ = 0.71073)                                              |
| 2 $\theta$ range for data collection/° | 4.86 to 50.02                                                                    |

|                                                |                                                               |
|------------------------------------------------|---------------------------------------------------------------|
| Index ranges                                   | $-12 \leq h \leq 12, -15 \leq k \leq 15, -17 \leq l \leq 17$  |
| Reflections collected                          | 24441                                                         |
| Independent reflections                        | 7126 [ $R_{\text{int}} = 0.0449, R_{\text{sigma}} = 0.0421$ ] |
| Data/restraints/parameters                     | 7126/65/514                                                   |
| Goodness-of-fit on $F^2$                       | 1.048                                                         |
| Final R indexes [ $I \geq 2\sigma(I)$ ]        | $R_1 = 0.0477, wR_2 = 0.1194$                                 |
| Final R indexes [all data]                     | $R_1 = 0.0535, wR_2 = 0.1238$                                 |
| Largest diff. peak/hole / $e \text{ \AA}^{-3}$ | 2.07/-1.70                                                    |

**Table S4. Bond Lengths for 1.**

| Atom | Atom | Length/ $\text{\AA}$ | Atom | Atom | Length/ $\text{\AA}$ |
|------|------|----------------------|------|------|----------------------|
| Ru1  | C11  | 2.4019(9)            | C17  | C18  | 1.377(6)             |
| Ru1  | C12  | 2.4532(10)           | C18  | C19  | 1.404(6)             |
| Ru1  | P1   | 2.3130(10)           | C19  | C20  | 1.464(6)             |
| Ru1  | P2   | 2.2880(11)           | C21  | C22  | 1.526(6)             |
| Ru1  | N1   | 2.096(3)             | C21  | C26  | 1.544(6)             |
| Ru1  | N2   | 2.103(3)             | C22  | C23  | 1.524(6)             |
| P1   | C1   | 1.848(4)             | C23  | C24  | 1.519(6)             |
| P1   | C7   | 1.838(4)             | C24  | C25  | 1.525(6)             |
| P1   | C14  | 1.846(4)             | C25  | C26  | 1.528(5)             |
| P2   | C33  | 1.839(4)             | C27  | C28  | 1.467(6)             |
| P2   | C34  | 1.844(4)             | C28  | C29  | 1.403(6)             |
| P2   | C40  | 1.840(4)             | C28  | C33  | 1.413(6)             |
| N1   | C20  | 1.282(5)             | C29  | C30  | 1.387(6)             |
| N1   | C21  | 1.490(5)             | C30  | C31  | 1.380(7)             |
| N2   | C26  | 1.488(5)             | C31  | C32  | 1.395(6)             |
| N2   | C27  | 1.281(5)             | C32  | C33  | 1.388(6)             |
| C1   | C2   | 1.397(6)             | C34  | C35  | 1.395(6)             |
| C1   | C6   | 1.403(6)             | C34  | C39  | 1.401(6)             |
| C2   | C3   | 1.392(6)             | C35  | C36  | 1.389(6)             |
| C3   | C4   | 1.382(6)             | C36  | C37  | 1.384(7)             |
| C4   | C5   | 1.390(6)             | C37  | C38  | 1.391(7)             |
| C5   | C6   | 1.387(6)             | C38  | C39  | 1.386(6)             |
| C7   | C8   | 1.395(6)             | C40  | C41  | 1.398(6)             |
| C7   | C13  | 1.399(6)             | C40  | C45  | 1.395(6)             |
| C8   | C9   | 1.392(6)             | C41  | C42  | 1.393(6)             |
| C9   | C10  | 1.381(7)             | C42  | C43  | 1.384(6)             |
| C10  | C11  | 1.384(7)             | C43  | C44  | 1.389(7)             |
| C11  | C13  | 1.396(6)             | C44  | C45  | 1.392(6)             |

|     |     |          |      |     |         |
|-----|-----|----------|------|-----|---------|
| C14 | C15 | 1.400(6) | C11S | C1S | 1.56(3) |
| C14 | C19 | 1.407(6) | C12S | C1S | 2.12(3) |
| C15 | C16 | 1.383(6) | C13S | C2S | 1.54(3) |
| C16 | C17 | 1.386(7) | C14S | C2S | 1.94(3) |

**Table S5. Bond Angles for 1.**

| Atom | Atom | Atom | Angle/°    | Atom | Atom | Atom | Angle/°  |
|------|------|------|------------|------|------|------|----------|
| C11  | Ru1  | Cl2  | 168.14(3)  | C15  | C14  | C19  | 117.7(4) |
| P1   | Ru1  | Cl1  | 86.64(3)   | C19  | C14  | P1   | 122.5(3) |
| P1   | Ru1  | Cl2  | 102.81(4)  | C16  | C15  | C14  | 122.2(4) |
| P2   | Ru1  | Cl1  | 95.61(4)   | C15  | C16  | C17  | 120.2(4) |
| P2   | Ru1  | Cl2  | 90.14(4)   | C18  | C17  | C16  | 118.6(4) |
| P2   | Ru1  | P1   | 98.43(4)   | C17  | C18  | C19  | 122.4(4) |
| N1   | Ru1  | Cl1  | 84.71(9)   | C14  | C19  | C20  | 128.0(4) |
| N1   | Ru1  | Cl2  | 87.79(9)   | C18  | C19  | C14  | 119.0(4) |
| N1   | Ru1  | P1   | 91.87(9)   | C18  | C19  | C20  | 113.0(4) |
| N1   | Ru1  | P2   | 169.69(10) | N1   | C20  | C19  | 130.1(4) |
| N1   | Ru1  | N2   | 80.61(13)  | N1   | C21  | C22  | 115.6(3) |
| N2   | Ru1  | Cl1  | 88.17(9)   | N1   | C21  | C26  | 106.4(3) |
| N2   | Ru1  | Cl2  | 81.54(9)   | C22  | C21  | C26  | 111.5(3) |
| N2   | Ru1  | P1   | 171.23(9)  | C23  | C22  | C21  | 111.9(3) |
| N2   | Ru1  | P2   | 89.10(10)  | C24  | C23  | C22  | 110.3(3) |
| C1   | P1   | Ru1  | 124.19(14) | C23  | C24  | C25  | 110.1(4) |
| C7   | P1   | Ru1  | 116.26(13) | C24  | C25  | C26  | 112.0(3) |
| C7   | P1   | C1   | 101.89(19) | N2   | C26  | C21  | 105.5(3) |
| C7   | P1   | C14  | 100.25(18) | N2   | C26  | C25  | 116.0(3) |
| C14  | P1   | Ru1  | 112.10(13) | C25  | C26  | C21  | 111.9(3) |
| C14  | P1   | C1   | 98.33(18)  | N2   | C27  | C28  | 128.7(4) |
| C33  | P2   | Ru1  | 109.72(14) | C29  | C28  | C27  | 114.1(4) |
| C33  | P2   | C34  | 101.10(18) | C29  | C28  | C33  | 118.7(4) |
| C33  | P2   | C40  | 102.34(18) | C33  | C28  | C27  | 127.2(4) |
| C34  | P2   | Ru1  | 120.09(13) | C30  | C29  | C28  | 121.2(4) |
| C40  | P2   | Ru1  | 120.17(14) | C31  | C30  | C29  | 119.9(4) |
| C40  | P2   | C34  | 100.53(18) | C30  | C31  | C32  | 119.6(4) |
| C20  | N1   | Ru1  | 131.6(3)   | C33  | C32  | C31  | 121.4(4) |
| C20  | N1   | C21  | 117.2(3)   | C28  | C33  | P2   | 120.5(3) |
| C21  | N1   | Ru1  | 111.0(2)   | C32  | C33  | P2   | 120.3(3) |
| C26  | N2   | Ru1  | 109.8(2)   | C32  | C33  | C28  | 119.1(4) |
| C27  | N2   | Ru1  | 130.4(3)   | C35  | C34  | P2   | 123.2(3) |
| C27  | N2   | C26  | 119.1(3)   | C35  | C34  | C39  | 118.8(4) |

|     |     |     |          |      |     |      |           |
|-----|-----|-----|----------|------|-----|------|-----------|
| C2  | C1  | P1  | 119.0(3) | C39  | C34 | P2   | 117.9(3)  |
| C2  | C1  | C6  | 118.2(4) | C36  | C35 | C34  | 120.5(4)  |
| C6  | C1  | P1  | 122.7(3) | C37  | C36 | C35  | 120.5(4)  |
| C3  | C2  | C1  | 120.7(4) | C36  | C37 | C38  | 119.3(4)  |
| C4  | C3  | C2  | 120.6(4) | C39  | C38 | C37  | 120.6(4)  |
| C3  | C4  | C5  | 119.4(4) | C38  | C39 | C34  | 120.3(4)  |
| C6  | C5  | C4  | 120.4(4) | C41  | C40 | P2   | 123.1(3)  |
| C5  | C6  | C1  | 120.8(4) | C45  | C40 | P2   | 117.8(3)  |
| C8  | C7  | P1  | 120.6(3) | C45  | C40 | C41  | 119.1(4)  |
| C8  | C7  | C13 | 118.8(4) | C42  | C41 | C40  | 120.2(4)  |
| C13 | C7  | P1  | 120.5(3) | C43  | C42 | C41  | 120.2(4)  |
| C9  | C8  | C7  | 120.3(4) | C42  | C43 | C44  | 120.1(4)  |
| C10 | C9  | C8  | 120.5(4) | C43  | C44 | C45  | 120.0(4)  |
| C9  | C10 | C11 | 119.7(4) | C44  | C45 | C40  | 120.4(4)  |
| C10 | C11 | C13 | 120.4(4) | C11S | C1S | C12S | 94.6(14)  |
| C11 | C13 | C7  | 120.2(4) | C13S | C2S | C14S | 109.1(16) |
| C15 | C14 | P1  | 119.6(3) |      |     |      |           |

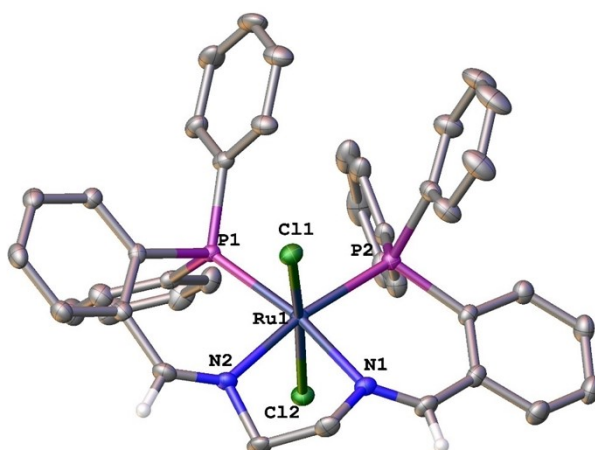

**Figure S31.** ORTEP diagrams of the molecular structures of **2**. Ellipsoids are set at 50% probability.

**Table S6. Crystal data and structure refinement for 2.**

| Identification code | <b>2</b>                                                                                        |
|---------------------|-------------------------------------------------------------------------------------------------|
| Empirical formula   | C <sub>45</sub> H <sub>48</sub> Cl <sub>2</sub> N <sub>2</sub> O <sub>2</sub> P <sub>2</sub> Ru |
| Formula weight      | 882.76                                                                                          |
| Temperature/K       | 100.0                                                                                           |
| Crystal system      | monoclinic                                                                                      |
| Space group         | <i>P</i> 2 <sub>1</sub> / <i>n</i>                                                              |
| <i>a</i> /Å         | 13.2836(6)                                                                                      |
| <i>b</i> /Å         | 10.3229(5)                                                                                      |

|                                               |                                                               |
|-----------------------------------------------|---------------------------------------------------------------|
| $c/\text{\AA}$                                | 29.8771(14)                                                   |
| $\alpha/^\circ$                               | 90                                                            |
| $\beta/^\circ$                                | 91.870(2)                                                     |
| $\gamma/^\circ$                               | 90                                                            |
| Volume/ $\text{\AA}^3$                        | 4094.7(3)                                                     |
| $Z$                                           | 4                                                             |
| $\rho_{\text{calc}}/\text{g/cm}^3$            | 1.432                                                         |
| $\mu/\text{mm}^{-1}$                          | 0.632                                                         |
| $F(000)$                                      | 1824.0                                                        |
| Crystal size/ $\text{mm}^3$                   | $0.15 \times 0.14 \times 0.1$                                 |
| Radiation                                     | MoK $\alpha$ ( $\lambda = 0.71073$ )                          |
| $2\theta$ range for data collection/ $^\circ$ | 4.174 to 51.996                                               |
| Index ranges                                  | $-16 \leq h \leq 16, -12 \leq k \leq 12, -35 \leq l \leq 36$  |
| Reflections collected                         | 42943                                                         |
| Independent reflections                       | 8043 [ $R_{\text{int}} = 0.0876, R_{\text{sigma}} = 0.0566$ ] |
| Data/restraints/parameters                    | 8043/0/491                                                    |
| Goodness-of-fit on $F^2$                      | 1.060                                                         |
| Final R indexes [ $I \geq 2\sigma(I)$ ]       | $R_1 = 0.0397, wR_2 = 0.1009$                                 |
| Final R indexes [all data]                    | $R_1 = 0.0467, wR_2 = 0.1056$                                 |
| Largest diff. peak/hole / $e \text{\AA}^{-3}$ | 1.26/-0.95                                                    |

**Table S7. Bond Lengths for 2.**

| Atom | Atom | Length/ $\text{\AA}$ | Atom | Atom | Length/ $\text{\AA}$ |
|------|------|----------------------|------|------|----------------------|
| Ru1  | C11  | 2.4179(7)            | C14  | C15  | 1.379(4)             |
| Ru1  | C12  | 2.4076(7)            | C15  | C16  | 1.390(5)             |
| Ru1  | P1   | 2.2885(7)            | C16  | C17  | 1.381(4)             |
| Ru1  | P2   | 2.2882(7)            | C17  | C18  | 1.404(4)             |
| Ru1  | N1   | 2.093(2)             | C18  | C19  | 1.462(4)             |
| Ru1  | N2   | 2.096(2)             | C20  | C21  | 1.512(4)             |
| P1   | C6   | 1.843(3)             | C22  | C23  | 1.466(4)             |
| P1   | C12  | 1.839(3)             | C23  | C24  | 1.404(4)             |
| P1   | C13  | 1.845(3)             | C23  | C28  | 1.409(4)             |
| P2   | C28  | 1.838(3)             | C24  | C25  | 1.383(4)             |
| P2   | C29  | 1.845(3)             | C25  | C26  | 1.382(4)             |
| P2   | C35  | 1.840(3)             | C26  | C27  | 1.390(4)             |
| N1   | C21  | 1.475(3)             | C27  | C28  | 1.395(4)             |
| N1   | C22  | 1.278(4)             | C29  | C30  | 1.398(4)             |
| N2   | C19  | 1.275(4)             | C29  | C34  | 1.397(4)             |
| N2   | C20  | 1.479(3)             | C30  | C31  | 1.392(4)             |
| C1   | C2   | 1.387(4)             | C31  | C32  | 1.386(5)             |

|     |     |          |     |     |          |
|-----|-----|----------|-----|-----|----------|
| C1  | C6  | 1.412(4) | C32 | C33 | 1.383(5) |
| C2  | C3  | 1.380(5) | C33 | C34 | 1.392(4) |
| C3  | C4  | 1.376(5) | C35 | C36 | 1.394(4) |
| C4  | C5  | 1.404(5) | C35 | C40 | 1.394(4) |
| C5  | C6  | 1.384(4) | C36 | C37 | 1.397(4) |
| C7  | C8  | 1.390(5) | C37 | C38 | 1.376(5) |
| C7  | C12 | 1.398(4) | C38 | C39 | 1.393(5) |
| C8  | C9  | 1.372(5) | C39 | C40 | 1.387(4) |
| C9  | C10 | 1.393(5) | O1S | C3S | 1.477(5) |
| C10 | C11 | 1.388(4) | O1S | C4S | 1.434(6) |
| C11 | C12 | 1.401(4) | C2S | C3S | 1.468(8) |
| C13 | C14 | 1.399(4) | C4S | C5S | 1.390(8) |
| C13 | C18 | 1.411(4) | O2S | C1S | 1.391(6) |

**Table S8. Bond Angles for 2.**

| Atom | Atom | Atom | Angle/°    | Atom | Atom | Atom | Angle/°  |
|------|------|------|------------|------|------|------|----------|
| Cl2  | Ru1  | C11  | 170.67(2)  | C7   | C12  | P1   | 123.1(2) |
| P1   | Ru1  | C11  | 98.17(2)   | C7   | C12  | C11  | 118.6(3) |
| P1   | Ru1  | Cl2  | 89.05(2)   | C11  | C12  | P1   | 117.9(2) |
| P2   | Ru1  | C11  | 89.40(2)   | C14  | C13  | P1   | 118.4(2) |
| P2   | Ru1  | Cl2  | 95.09(3)   | C14  | C13  | C18  | 117.9(3) |
| P2   | Ru1  | P1   | 100.68(3)  | C18  | C13  | P1   | 123.5(2) |
| N1   | Ru1  | C11  | 84.08(7)   | C15  | C14  | C13  | 122.4(3) |
| N1   | Ru1  | Cl2  | 87.87(7)   | C14  | C15  | C16  | 119.4(3) |
| N1   | Ru1  | P1   | 170.68(7)  | C17  | C16  | C15  | 119.8(3) |
| N1   | Ru1  | P2   | 88.36(7)   | C16  | C17  | C18  | 121.2(3) |
| N1   | Ru1  | N2   | 81.17(9)   | C13  | C18  | C19  | 126.4(3) |
| N2   | Ru1  | C11  | 89.25(6)   | C17  | C18  | C13  | 119.3(3) |
| N2   | Ru1  | Cl2  | 84.84(6)   | C17  | C18  | C19  | 114.3(3) |
| N2   | Ru1  | P1   | 89.80(6)   | N2   | C19  | C18  | 128.7(3) |
| N2   | Ru1  | P2   | 169.52(6)  | N2   | C20  | C21  | 107.0(2) |
| C6   | P1   | Ru1  | 118.69(9)  | N1   | C21  | C20  | 107.0(2) |
| C6   | P1   | C13  | 96.17(13)  | N1   | C22  | C23  | 128.0(3) |
| C12  | P1   | Ru1  | 117.03(9)  | C24  | C23  | C22  | 114.3(2) |
| C12  | P1   | C6   | 108.99(13) | C24  | C23  | C28  | 119.1(3) |
| C12  | P1   | C13  | 99.84(13)  | C28  | C23  | C22  | 126.5(2) |
| C13  | P1   | Ru1  | 112.57(9)  | C25  | C24  | C23  | 121.5(3) |
| C28  | P2   | Ru1  | 111.14(9)  | C26  | C25  | C24  | 119.4(3) |
| C28  | P2   | C29  | 102.05(12) | C25  | C26  | C27  | 120.0(3) |

|     |     |     |            |     |     |     |          |
|-----|-----|-----|------------|-----|-----|-----|----------|
| C28 | P2  | C35 | 101.08(12) | C26 | C27 | C28 | 121.6(3) |
| C29 | P2  | Ru1 | 119.51(10) | C23 | C28 | P2  | 121.2(2) |
| C35 | P2  | Ru1 | 118.88(9)  | C27 | C28 | P2  | 120.2(2) |
| C35 | P2  | C29 | 101.44(13) | C27 | C28 | C23 | 118.4(2) |
| C21 | N1  | Ru1 | 109.34(16) | C30 | C29 | P2  | 117.7(2) |
| C22 | N1  | Ru1 | 133.25(19) | C34 | C29 | P2  | 123.1(2) |
| C22 | N1  | C21 | 116.8(2)   | C34 | C29 | C30 | 119.2(3) |
| C19 | N2  | Ru1 | 133.2(2)   | C31 | C30 | C29 | 120.0(3) |
| C19 | N2  | C20 | 116.5(2)   | C32 | C31 | C30 | 120.4(3) |
| C20 | N2  | Ru1 | 109.27(17) | C33 | C32 | C31 | 119.9(3) |
| C2  | C1  | C6  | 121.5(3)   | C32 | C33 | C34 | 120.3(3) |
| C3  | C2  | C1  | 119.3(3)   | C33 | C34 | C29 | 120.1(3) |
| C4  | C3  | C2  | 120.4(3)   | C36 | C35 | P2  | 123.4(2) |
| C3  | C4  | C5  | 120.5(3)   | C40 | C35 | P2  | 118.1(2) |
| C6  | C5  | C4  | 120.2(3)   | C40 | C35 | C36 | 118.3(3) |
| C1  | C6  | P1  | 113.2(2)   | C35 | C36 | C37 | 120.8(3) |
| C5  | C6  | P1  | 128.7(2)   | C38 | C37 | C36 | 120.1(3) |
| C5  | C6  | C1  | 118.0(3)   | C37 | C38 | C39 | 119.7(3) |
| C8  | C7  | C12 | 120.1(3)   | C40 | C39 | C38 | 120.1(3) |
| C9  | C8  | C7  | 120.8(3)   | C39 | C40 | C35 | 120.9(3) |
| C8  | C9  | C10 | 120.0(3)   | C4S | O1S | C3S | 109.4(4) |
| C11 | C10 | C9  | 119.7(3)   | C2S | C3S | O1S | 109.5(4) |
| C10 | C11 | C12 | 120.8(3)   | C5S | C4S | O1S | 113.0(5) |

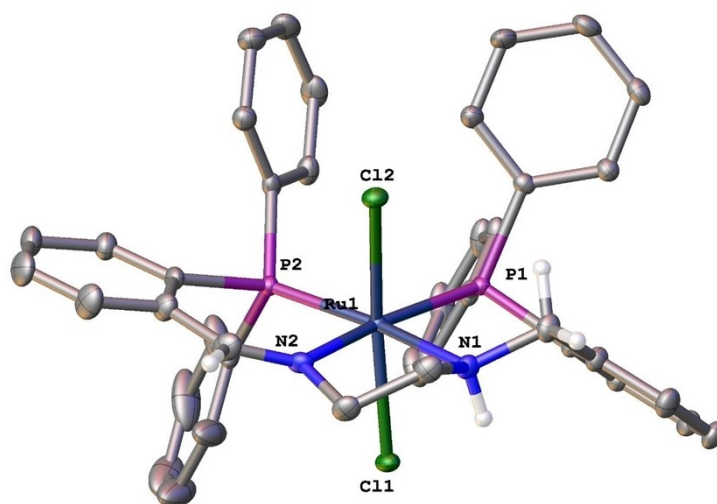

**Figure S32.** ORTEP diagrams of the molecular structures of **3**. Ellipsoids are set at 50% probability.

**Table S9. Crystal data and structure refinement for 3.**

|                                               |                                                               |
|-----------------------------------------------|---------------------------------------------------------------|
| Identification code                           | <b>3</b>                                                      |
| Empirical formula                             | $C_{42.96}H_{43.23}Cl_{2.69}N_2O_{0.65}P_2Ru$                 |
| Formula weight                                | 856.48                                                        |
| Temperature/K                                 | 100.02                                                        |
| Crystal system                                | monoclinic                                                    |
| Space group                                   | $C2/c$                                                        |
| $a/\text{\AA}$                                | 39.124(3)                                                     |
| $b/\text{\AA}$                                | 10.1523(8)                                                    |
| $c/\text{\AA}$                                | 24.618(2)                                                     |
| $\alpha/^\circ$                               | 90                                                            |
| $\beta/^\circ$                                | 123.769(2)                                                    |
| $\gamma/^\circ$                               | 90                                                            |
| Volume/ $\text{\AA}^3$                        | 8128.5(11)                                                    |
| $Z$                                           | 8                                                             |
| $\rho_{\text{calc}}/\text{g/cm}^3$            | 1.400                                                         |
| $\mu/\text{mm}^{-1}$                          | 0.676                                                         |
| $F(000)$                                      | 3520.0                                                        |
| Crystal size/ $\text{mm}^3$                   | $0.38 \times 0.26 \times 0.2$                                 |
| Radiation                                     | MoK $\alpha$ ( $\lambda = 0.71073$ )                          |
| $2\theta$ range for data collection/ $^\circ$ | 4.202 to 55.132                                               |
| Index ranges                                  | $-45 \leq h \leq 50, -12 \leq k \leq 13, -32 \leq l \leq 32$  |
| Reflections collected                         | 35457                                                         |
| Independent reflections                       | 9176 [ $R_{\text{int}} = 0.0582, R_{\text{sigma}} = 0.0507$ ] |
| Data/restraints/parameters                    | 9176/28/499                                                   |
| Goodness-of-fit on $F^2$                      | 1.067                                                         |
| Final R indexes [ $I \geq 2\sigma(I)$ ]       | $R_1 = 0.0427, wR_2 = 0.1103$                                 |
| Final R indexes [all data]                    | $R_1 = 0.0431, wR_2 = 0.1107$                                 |
| Largest diff. peak/hole / $e \text{\AA}^{-3}$ | 1.54/-0.89                                                    |

**Table S10. Bond Lengths for 3.**

| Atom | Atom | Length/ $\text{\AA}$ | Atom | Atom | Length/ $\text{\AA}$ |
|------|------|----------------------|------|------|----------------------|
| Ru1  | Cl1  | 2.4210(6)            | C15  | C16  | 1.380(4)             |
| Ru1  | Cl2  | 2.4078(6)            | C16  | C17  | 1.390(4)             |
| Ru1  | P1   | 2.3117(6)            | C17  | C18  | 1.396(3)             |
| Ru1  | P2   | 2.2657(6)            | C18  | C19  | 1.508(3)             |
| Ru1  | N1   | 2.178(2)             | C20  | C21  | 1.512(4)             |
| Ru1  | N2   | 2.087(2)             | C22  | C23  | 1.459(4)             |
| P1   | C1   | 1.833(2)             | C23  | C24  | 1.404(4)             |



|     |     |          |      |     |           |
|-----|-----|----------|------|-----|-----------|
| P1  | C7  | 1.835(2) | C23  | C28 | 1.411(4)  |
| P1  | C13 | 1.838(2) | C24  | C25 | 1.380(4)  |
| P2  | C28 | 1.841(2) | C25  | C26 | 1.383(4)  |
| P2  | C29 | 1.836(2) | C26  | C27 | 1.389(4)  |
| P2  | C35 | 1.839(3) | C27  | C28 | 1.401(3)  |
| N1  | C19 | 1.479(3) | C29  | C30 | 1.399(3)  |
| N1  | C20 | 1.482(3) | C29  | C34 | 1.403(3)  |
| N2  | C21 | 1.476(3) | C30  | C31 | 1.396(4)  |
| N2  | C22 | 1.276(3) | C31  | C32 | 1.383(4)  |
| C1  | C2  | 1.400(3) | C32  | C33 | 1.383(4)  |
| C1  | C6  | 1.400(3) | C33  | C34 | 1.398(4)  |
| C2  | C3  | 1.390(4) | C35  | C36 | 1.380(4)  |
| C3  | C4  | 1.389(5) | C35  | C40 | 1.411(4)  |
| C4  | C5  | 1.388(5) | C36  | C37 | 1.419(5)  |
| C5  | C6  | 1.389(4) | C37  | C38 | 1.395(8)  |
| C7  | C8  | 1.395(3) | C38  | C39 | 1.386(7)  |
| C7  | C12 | 1.400(3) | C39  | C40 | 1.388(5)  |
| C8  | C9  | 1.391(3) | Cl1S | C5S | 1.750(15) |
| C9  | C10 | 1.377(4) | Cl2S | C5S | 1.959(17) |
| C10 | C11 | 1.384(4) | O1S  | C2S | 1.442(9)  |
| C11 | C12 | 1.390(3) | O1S  | C3S | 1.305(7)  |
| C13 | C14 | 1.395(3) | C1S  | C2S | 1.422(9)  |
| C13 | C18 | 1.405(3) | C3S  | C4S | 1.589(9)  |
| C14 | C15 | 1.396(3) |      |     |           |

**Table S11. Bond Angles for 3.**

| Atom | Atom | Atom | Angle/°   | Atom | Atom | Atom | Angle/°    |
|------|------|------|-----------|------|------|------|------------|
| Cl2  | Ru1  | Cl1  | 168.30(2) | C10  | C11  | C12  | 121.2(2)   |
| P1   | Ru1  | Cl1  | 90.44(2)  | C11  | C12  | C7   | 119.7(2)   |
| P1   | Ru1  | Cl2  | 94.38(2)  | C14  | C13  | P1   | 121.79(18) |
| P2   | Ru1  | Cl1  | 98.14(2)  | C14  | C13  | C18  | 119.2(2)   |
| P2   | Ru1  | Cl2  | 91.56(2)  | C18  | C13  | P1   | 118.96(18) |
| P2   | Ru1  | P1   | 99.72(2)  | C13  | C14  | C15  | 120.9(2)   |
| N1   | Ru1  | Cl1  | 81.39(6)  | C16  | C15  | C14  | 120.0(2)   |
| N1   | Ru1  | Cl2  | 88.09(6)  | C15  | C16  | C17  | 119.6(2)   |
| N1   | Ru1  | P1   | 88.34(6)  | C16  | C17  | C18  | 121.4(2)   |
| N1   | Ru1  | P2   | 171.93(6) | C13  | C18  | C19  | 121.8(2)   |
| N2   | Ru1  | Cl1  | 89.63(6)  | C17  | C18  | C13  | 119.1(2)   |
| N2   | Ru1  | Cl2  | 83.60(6)  | C17  | C18  | C19  | 119.1(2)   |
| N2   | Ru1  | P1   | 168.99(6) | N1   | C19  | C18  | 109.2(2)   |

---

|     |     |     |            |      |     |      |            |
|-----|-----|-----|------------|------|-----|------|------------|
| N2  | Ru1 | P2  | 91.16(6)   | N1   | C20 | C21  | 106.8(2)   |
| N2  | Ru1 | N1  | 80.79(8)   | N2   | C21 | C20  | 109.29(19) |
| C1  | P1  | Ru1 | 120.54(8)  | N2   | C22 | C23  | 128.6(2)   |
| C1  | P1  | C7  | 100.70(11) | C24  | C23 | C22  | 114.1(2)   |
| C1  | P1  | C13 | 102.72(11) | C24  | C23 | C28  | 119.1(2)   |
| C7  | P1  | Ru1 | 119.45(8)  | C28  | C23 | C22  | 126.7(2)   |
| C7  | P1  | C13 | 100.18(10) | C25  | C24 | C23  | 121.9(3)   |
| C13 | P1  | Ru1 | 110.27(8)  | C24  | C25 | C26  | 119.2(3)   |
| C28 | P2  | Ru1 | 113.33(8)  | C25  | C26 | C27  | 119.9(3)   |
| C29 | P2  | Ru1 | 117.87(8)  | C26  | C27 | C28  | 122.0(3)   |
| C29 | P2  | C28 | 100.22(11) | C23  | C28 | P2   | 123.78(19) |
| C29 | P2  | C35 | 106.83(12) | C27  | C28 | P2   | 118.29(19) |
| C35 | P2  | Ru1 | 118.94(9)  | C27  | C28 | C23  | 117.9(2)   |
| C35 | P2  | C28 | 96.03(11)  | C30  | C29 | P2   | 118.86(18) |
| C19 | N1  | Ru1 | 118.57(15) | C30  | C29 | C34  | 118.4(2)   |
| C19 | N1  | C20 | 113.91(19) | C34  | C29 | P2   | 122.34(19) |
| C20 | N1  | Ru1 | 106.93(15) | C31  | C30 | C29  | 121.0(2)   |
| C21 | N2  | Ru1 | 110.61(15) | C32  | C31 | C30  | 119.8(3)   |
| C22 | N2  | Ru1 | 133.20(18) | C31  | C32 | C33  | 120.2(2)   |
| C22 | N2  | C21 | 115.6(2)   | C32  | C33 | C34  | 120.4(3)   |
| C2  | C1  | P1  | 118.55(19) | C33  | C34 | C29  | 120.2(3)   |
| C6  | C1  | P1  | 122.47(19) | C36  | C35 | P2   | 126.6(2)   |
| C6  | C1  | C2  | 118.9(2)   | C36  | C35 | C40  | 119.4(3)   |
| C3  | C2  | C1  | 120.4(3)   | C40  | C35 | P2   | 114.0(2)   |
| C4  | C3  | C2  | 120.2(3)   | C35  | C36 | C37  | 119.4(4)   |
| C5  | C4  | C3  | 119.9(3)   | C38  | C37 | C36  | 120.2(4)   |
| C4  | C5  | C6  | 120.2(3)   | C39  | C38 | C37  | 120.3(3)   |
| C5  | C6  | C1  | 120.4(3)   | C38  | C39 | C40  | 119.4(4)   |
| C8  | C7  | P1  | 122.34(18) | C39  | C40 | C35  | 121.2(4)   |
| C8  | C7  | C12 | 118.6(2)   | Cl1S | C5S | Cl2S | 95.4(7)    |
| C12 | C7  | P1  | 118.81(17) | C3S  | O1S | C2S  | 106.5(6)   |
| C9  | C8  | C7  | 121.0(2)   | C1S  | C2S | O1S  | 101.2(6)   |
| C10 | C9  | C8  | 120.1(2)   | O1S  | C3S | C4S  | 103.3(5)   |
| C9  | C10 | C11 | 119.5(2)   |      |     |      |            |

---

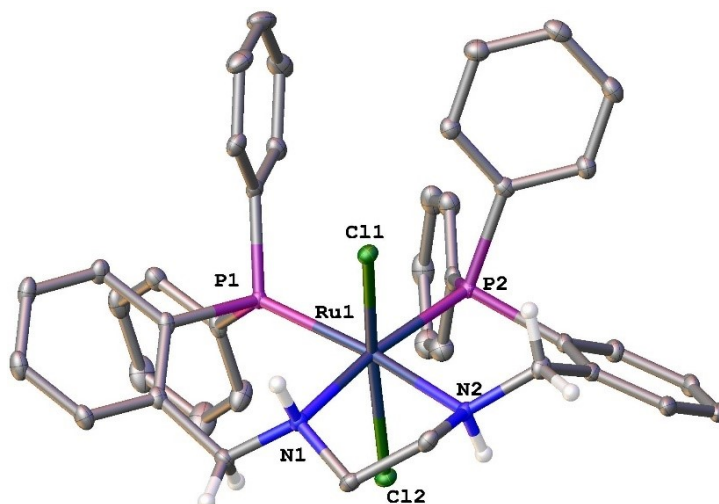

**Figure S33.** ORTEP diagrams of the molecular structures of **4**. Ellipsoids are set at 50% probability.

**Table S12. Crystal data and structure refinement for 4.**

| Identification code                           | <b>4</b>                                                      |
|-----------------------------------------------|---------------------------------------------------------------|
| Empirical formula                             | $C_{41}H_{40}Cl_4N_2P_2Ru$                                    |
| Formula weight                                | 865.56                                                        |
| Temperature/K                                 | 100.0                                                         |
| Crystal system                                | monoclinic                                                    |
| Space group                                   | $P2_1/n$                                                      |
| $a/\text{\AA}$                                | 10.7044(4)                                                    |
| $b/\text{\AA}$                                | 15.6123(6)                                                    |
| $c/\text{\AA}$                                | 23.0008(10)                                                   |
| $\alpha/^\circ$                               | 90                                                            |
| $\beta/^\circ$                                | 95.634(2)                                                     |
| $\gamma/^\circ$                               | 90                                                            |
| Volume/ $\text{\AA}^3$                        | 3825.3(3)                                                     |
| $Z$                                           | 4                                                             |
| $\rho_{\text{calc}}/\text{g/cm}^3$            | 1.503                                                         |
| $\mu/\text{mm}^{-1}$                          | 0.806                                                         |
| $F(000)$                                      | 1768.0                                                        |
| Crystal size/ $\text{mm}^3$                   | $0.18 \times 0.09 \times 0.08$                                |
| Radiation                                     | MoK $\alpha$ ( $\lambda = 0.71073$ )                          |
| $2\theta$ range for data collection/ $^\circ$ | 4.372 to 55.058                                               |
| Index ranges                                  | $-13 \leq h \leq 13, -20 \leq k \leq 19, -29 \leq l \leq 29$  |
| Reflections collected                         | 37085                                                         |
| Independent reflections                       | 8795 [ $R_{\text{int}} = 0.0404, R_{\text{sigma}} = 0.0342$ ] |
| Data/restraints/parameters                    | 8795/0/451                                                    |
| Goodness-of-fit on $F^2$                      | 1.025                                                         |

|                                                |                               |
|------------------------------------------------|-------------------------------|
| Final R indexes [ $I \geq 2\sigma(I)$ ]        | $R_1 = 0.0236, wR_2 = 0.0613$ |
| Final R indexes [all data]                     | $R_1 = 0.0249, wR_2 = 0.0623$ |
| Largest diff. peak/hole / $e \text{ \AA}^{-3}$ | 1.37/-0.53                    |

**Table S13. Bond Lengths for 4.**

| Atom | Atom | Length/Å   | Atom | Atom | Length/Å   |
|------|------|------------|------|------|------------|
| Ru1  | C11  | 2.4032(3)  | C13  | C18  | 1.407(2)   |
| Ru1  | C12  | 2.4422(3)  | C14  | C15  | 1.390(2)   |
| Ru1  | P1   | 2.2936(4)  | C15  | C16  | 1.389(2)   |
| Ru1  | P2   | 2.2937(4)  | C16  | C17  | 1.383(2)   |
| Ru1  | N1   | 2.1517(12) | C17  | C18  | 1.405(2)   |
| Ru1  | N2   | 2.1610(12) | C18  | C19  | 1.507(2)   |
| P1   | C1   | 1.8329(15) | C20  | C21  | 1.516(2)   |
| P1   | C7   | 1.8520(15) | C22  | C23  | 1.515(2)   |
| P1   | C13  | 1.8612(15) | C23  | C24  | 1.397(2)   |
| P2   | C28  | 1.8458(15) | C23  | C28  | 1.411(2)   |
| P2   | C29  | 1.8518(16) | C24  | C25  | 1.396(2)   |
| P2   | C35  | 1.8401(15) | C25  | C26  | 1.387(2)   |
| N1   | C19  | 1.4811(18) | C26  | C27  | 1.392(2)   |
| N1   | C20  | 1.4918(18) | C27  | C28  | 1.399(2)   |
| N2   | C21  | 1.4870(18) | C29  | C30  | 1.402(2)   |
| N2   | C22  | 1.4824(19) | C29  | C34  | 1.398(2)   |
| C1   | C2   | 1.400(2)   | C30  | C31  | 1.394(2)   |
| C1   | C6   | 1.403(2)   | C31  | C32  | 1.388(2)   |
| C2   | C3   | 1.388(2)   | C32  | C33  | 1.391(2)   |
| C3   | C4   | 1.392(3)   | C33  | C34  | 1.396(2)   |
| C4   | C5   | 1.389(3)   | C35  | C36  | 1.396(2)   |
| C5   | C6   | 1.391(2)   | C35  | C40  | 1.405(2)   |
| C7   | C8   | 1.405(2)   | C36  | C37  | 1.397(2)   |
| C7   | C12  | 1.390(2)   | C37  | C38  | 1.388(3)   |
| C8   | C9   | 1.389(2)   | C38  | C39  | 1.385(3)   |
| C9   | C10  | 1.390(3)   | C39  | C40  | 1.393(2)   |
| C10  | C11  | 1.384(3)   | Cl1S | C1S  | 1.767(2)   |
| C11  | C12  | 1.401(2)   | Cl2S | C1S  | 1.7667(18) |
| C13  | C14  | 1.407(2)   |      |      |            |

**Table S14. Bond Angles for 4.**

| Atom | Atom | Atom | Angle/°     | Atom | Atom | Atom | Angle/°    |
|------|------|------|-------------|------|------|------|------------|
| Cl1  | Ru1  | Cl2  | 164.959(12) | C8   | C9   | C10  | 120.01(15) |
| P1   | Ru1  | Cl1  | 90.295(13)  | C11  | C10  | C9   | 119.80(15) |

---

|     |     |     |             |     |     |     |            |
|-----|-----|-----|-------------|-----|-----|-----|------------|
| P1  | Ru1 | Cl2 | 101.097(13) | C10 | C11 | C12 | 120.38(17) |
| A   | Ru1 | P2  | 99.544(13)  | C7  | C12 | C11 | 120.30(16) |
| P2  | Ru1 | Cl1 | 95.069(13)  | C14 | C13 | P1  | 120.60(11) |
| P2  | Ru1 | Cl2 | 92.706(13)  | C18 | C13 | P1  | 121.09(11) |
| N1  | Ru1 | Cl1 | 83.72(3)    | C18 | C13 | C14 | 118.06(13) |
| N1  | Ru1 | Cl2 | 86.47(3)    | C15 | C14 | C13 | 121.91(14) |
| N1  | Ru1 | P1  | 89.98(3)    | C16 | C15 | C14 | 119.66(14) |
| N1  | Ru1 | P2  | 170.42(3)   | C17 | C16 | C15 | 119.36(14) |
| N1  | Ru1 | N2  | 80.54(5)    | C16 | C17 | C18 | 121.75(14) |
| N2  | Ru1 | Cl1 | 86.66(3)    | C13 | C18 | C19 | 123.96(13) |
| N2  | Ru1 | Cl2 | 80.49(3)    | C17 | C18 | C13 | 119.25(13) |
| N2  | Ru1 | P1  | 170.30(3)   | C17 | C18 | C19 | 116.79(13) |
| N2  | Ru1 | P2  | 89.91(3)    | N1  | C19 | C18 | 111.54(12) |
| C1  | P1  | Ru1 | 116.20(5)   | N1  | C20 | C21 | 107.64(12) |
| C1  | P1  | C7  | 100.54(7)   | N2  | C21 | C20 | 106.86(11) |
| C1  | P1  | C13 | 102.01(7)   | N2  | C22 | C23 | 109.48(11) |
| C7  | P1  | Ru1 | 125.55(5)   | C24 | C23 | C22 | 118.04(13) |
| C7  | P1  | C13 | 96.06(6)    | C24 | C23 | C28 | 119.18(14) |
| C13 | P1  | Ru1 | 112.52(5)   | C28 | C23 | C22 | 122.77(13) |
| C28 | P2  | Ru1 | 110.36(5)   | C25 | C24 | C23 | 121.26(14) |
| C28 | P2  | C29 | 98.50(7)    | C26 | C25 | C24 | 119.61(14) |
| C29 | P2  | Ru1 | 121.70(5)   | C25 | C26 | C27 | 119.66(14) |
| C35 | P2  | Ru1 | 118.68(5)   | C26 | C27 | C28 | 121.51(14) |
| C35 | P2  | C28 | 102.46(7)   | C23 | C28 | P2  | 119.49(11) |
| C35 | P2  | C29 | 101.83(7)   | C27 | C28 | P2  | 121.54(11) |
| C19 | N1  | Ru1 | 117.52(9)   | C27 | C28 | C23 | 118.76(13) |
| C19 | N1  | C20 | 111.68(11)  | C30 | C29 | P2  | 121.42(12) |
| C20 | N1  | Ru1 | 108.31(8)   | C34 | C29 | P2  | 120.19(11) |
| C21 | N2  | Ru1 | 107.69(8)   | C34 | C29 | C30 | 118.35(14) |
| C22 | N2  | Ru1 | 118.01(9)   | C31 | C30 | C29 | 120.98(14) |
| C22 | N2  | C21 | 113.36(11)  | C32 | C31 | C30 | 120.07(15) |
| C2  | C1  | P1  | 120.34(11)  | C31 | C32 | C33 | 119.57(15) |
| C2  | C1  | C6  | 118.73(14)  | C32 | C33 | C34 | 120.50(15) |
| C6  | C1  | P1  | 120.68(11)  | C33 | C34 | C29 | 120.51(14) |
| C3  | C2  | C1  | 120.47(14)  | C36 | C35 | P2  | 123.02(12) |
| C2  | C3  | C4  | 120.35(15)  | C36 | C35 | C40 | 118.65(14) |
| C5  | C4  | C3  | 119.79(15)  | C40 | C35 | P2  | 118.28(11) |
| C4  | C5  | C6  | 120.11(15)  | C35 | C36 | C37 | 120.55(15) |
| C5  | C6  | C1  | 120.55(14)  | C38 | C37 | C36 | 120.21(15) |
| C8  | C7  | P1  | 120.31(11)  | C39 | C38 | C37 | 119.70(14) |

---

---

|     |    |    |            |      |     |      |            |
|-----|----|----|------------|------|-----|------|------------|
| C12 | C7 | P1 | 120.53(12) | C38  | C39 | C40  | 120.49(16) |
| C12 | C7 | C8 | 118.73(14) | C39  | C40 | C35  | 120.35(15) |
| C9  | C8 | C7 | 120.76(15) | C12S | C1S | C11S | 112.13(10) |

---
